# Supplementary material for: The Rate and Spectrum of Spontaneous Mutations in Mycobacterium smegmatis, a Bacterium Naturally Devoid of the Postreplicative Mismatch Repair Pathway
Source: G3 (Bethesda). 2016 May 17;6(7):2157–63. doi: 10.1534/g3.116.030130 (PMC4938668; doi:10.1534/g3.116.030130)
Supplement: Supplemental Material [file supp_g3.116.030130_TableS1.xlsx]

## Sheet: S1
Suppl. Table 1. Mycobacterium smegmatis base substitution and inserion-deletion (indel) summary statistics
MA Line						Substitutions						Indels			Total sites	Gen.	Sites×Gen	Base-sub Rate	Indel Rate
	Chromosome coverage	A sites	C sites	G sites	T sites	Transitions		Transversions				Ins.	Del.	Ts/Tva
						GC>AT	AT>GC	AT>TA	GC>TA	AT>CG	GC>CG
Sample_1	60.5928	1101761	2279875	2276378	1098849	7	11	0	5	1	1	1	2	2.57143	6756863	4900	33108628700	7.5509e-10	9.06108e-11
Sample_5	117.364	1103242	2282612	2279149	1100354	10	3	1	9	0	2	3	0	1.08333	6765357	4900	33150249300	7.54142e-10	9.04971e-11
Sample_6	95.2738	1103235	2282660	2279197	1100331	7	7	0	1	4	3	2	2	1.75	6765423	4900	33150572700	6.63639e-10	1.20662e-10
Sample_8	86.1058	1103318	2282842	2279348	1100397	8	3	0	3	3	3	4	2	1.22222	6765905	4900	33152934500	6.03265e-10	1.80979e-10
Sample_9	70.2016	1103369	2282852	2279408	1100477	6	5	0	4	1	1	0	2	1.83333	6766106	4900	33153919400	5.1276e-10	6.03247e-11
Sample_10	113.597	1103423	2282945	2279502	1100548	6	3	0	3	2	2	2	2	1.28571	6766418	4900	33155448200	4.82575e-10	1.20644e-10
Sample_12	127.605	1103526	2283207	2279759	1100641	3	6	0	3	5	0	6	2	1.125	6767133	4900	33158951700	5.12682e-10	2.41262e-10
Sample_13	148.497	1102779	2281877	2278308	1099918	6	4	0	9	0	2	2	1	0.909091	6762882	4900	33138121800	6.33711e-10	9.05302e-11
Sample_14	116.887	1102415	2281167	2277558	1099500	8	6	0	3	2	1	5	2	2.33333	6760640	4900	33127136000	6.03735e-10	2.11307e-10
Sample_15	129.119	1103425	2282943	2279502	1100549	12	4	1	0	3	0	1	0	4	6766419	4900	33155453100	6.03219e-10	3.0161e-11
Sample_17	143.469	1103375	2282904	2279281	1100522	6	5	0	3	2	1	3	1	1.83333	6766082	4900	33153801800	5.12762e-10	1.2065e-10
Sample_19	194.931	1103555	2283081	2279640	1100688	3	5	0	2	1	0	3	2	2.66667	6766964	4900	33158123600	3.31744e-10	1.50793e-10
Sample_20	157.873	1103823	2283596	2280256	1100951	6	6	0	3	0	0	3	0	4	6768626	4900	33166267400	4.52267e-10	9.04534e-11
Sample_23	188.647	1103515	2283056	2279553	1100560	12	3	1	4	3	1	2	0	1.66667	6766684	4900	33156751600	7.23834e-10	6.03195e-11
Sample_25	111.164	1103833	2283707	2280274	1100942	10	3	0	1	0	2	1	3	4.33333	6768756	4900	33166904400	4.82409e-10	1.20602e-10
Sample_26	126.39	1102827	2282016	2278596	1099995	8	1	1	4	3	0	1	1	1.125	6763434	4900	33140826600	5.12962e-10	6.03485e-11
Sample_28	159.166	1103792	2283705	2280211	1100885	9	4	0	4	3	0	3	1	1.85714	6768593	4900	33166105700	6.03025e-10	1.20605e-10
Sample_29	111.425	1103979	2283982	2280459	1101049	6	1	0	4	1	1	1	1	1.16667	6769469	4900	33170398100	3.91916e-10	6.02947e-11
Sample_30	181.309	1102963	2282710	2279044	1100192	4	3	0	5	0	0	5	1	1.4	6764909	4900	33148054100	3.62012e-10	1.81006e-10
Sample_33	186.831	1103884	2283874	2280452	1101070	6	2	1	4	4	0	2	0	0.888889	6769280	4900	33169472000	5.12519e-10	6.02964e-11
Sample_34	127.047	1103136	2282946	2279372	1100339	6	4	0	5	1	0	1	6	1.66667	6765793	4900	33152385700	4.8262e-10	2.11146e-10
Sample_36	139.122	1104147	2284377	2280939	1101304	3	3	1	1	0	0	1	1	3	6770767	4900	33176758300	2.41133e-10	6.02832e-11
Sample_37	116.761	1104040	2284170	2280734	1101200	7	4	0	5	1	0	4	3	1.83333	6770144	4900	33173705600	5.12454e-10	2.1101e-10
Sample_39	142.143	1103035	2282149	2278780	1100247	4	6	0	4	3	2	2	2	1.11111	6764211	4900	33144633900	5.73245e-10	1.20683e-10
Sample_41	156.515	1103248	2282667	2279170	1100426	4	4	0	7	3	2	1	3	0.666667	6765511	4900	33151003900	6.033e-10	1.2066e-10
Sample_42	95.3867	1103565	2283203	2279738	1100741	4	6	2	1	4	1	3	0	1.25	6767247	4900	33159510300	5.42831e-10	9.04718e-11
Sample_43	85.0402	1103756	2283625	2280204	1100960	2	7	1	4	0	1	2	2	1.5	6768545	4900	33165870500	4.52272e-10	1.20606e-10
Sample_44	119.841	1103195	2282562	2279117	1100346	8	4	0	2	1	1	7	0	3	6765220	4900	33149578000	4.82661e-10	2.11164e-10
Sample_45	54.2198	1103303	2283216	2279631	1100499	6	4	1	2	2	0	7	0	2	6766649	4900	33156580100	4.52399e-10	2.11119e-10
Sample_46	75.3171	1103268	2283179	2279543	1100453	4	4	0	5	1	1	3	1	1.14286	6766443	4900	33155570700	4.52413e-10	1.20643e-10
Sample_47	102.961	1103915	2283957	2280507	1101077	5	5	0	2	1	0	3	2	3.33333	6769456	4900	33170334400	3.91916e-10	1.50737e-10
Sample_48	76.9791	1104039	2284135	2280688	1101180	4	5	0	4	3	1	3	0	1.125	6770042	4900	33173205800	5.12462e-10	9.04344e-11
Sample_49	68.8664	1103493	2283073	2279633	1100622	6	10	0	3	6	0	12	1	1.77778	6766821	4900	33157422900	7.53979e-10	3.92069e-10
Sample_51	170.611	1103810	2283677	2280173	1100911	6	1	0	1	1	2	1	0	1.75	6768571	4900	33165997900	3.31665e-10	3.01514e-11
Sample_52	192.1	1102962	2282604	2278995	1100190	1	6	1	2	2	0	2	1	1.4	6764751	4900	33147279900	3.62021e-10	9.05052e-11
Sample_57	142.979	1103595	2283334	2279865	1100718	3	0	0	3	1	1	3	2	0.6	6767512	4900	33160808800	2.41249e-10	1.5078e-10
Sample_59	207.169	1103838	2283776	2280314	1100989	6	1	0	1	3	3	4	2	1	6768917	4900	33167693300	4.22097e-10	1.80899e-10
Sample_61	244.553	1103745	2283570	2280118	1100908	10	1	0	2	4	0	4	4	1.83333	6768341	4900	33164870900	5.12591e-10	2.41219e-10
Sample_64	156.829	1103557	2283204	2279781	1100694	3	4	0	5	2	1	1	2	0.875	6767236	4900	33159456400	4.5236e-10	9.04719e-11
Sample_65	117.986	1103756	2283585	2280143	1100931	8	8	0	3	1	2	7	3	2.66667	6768415	4900	33165233500	6.63345e-10	3.01521e-10
Sample_66	126.975	1103170	2282471	2278737	1100172	5	3	0	4	4	1	1	0	0.888889	6764550	4900	33146295000	5.12878e-10	3.01693e-11
Sample_68	192.146	1102874	2281868	2278469	1100060	10	5	0	4	2	2	0	2	1.875	6763271	4900	33140027900	6.94025e-10	6.035e-11
Sample_69	145.458	1103733	2283596	2280120	1100882	7	6	0	5	6	2	0	0	1	6768331	4900	33164821900	7.83963e-10	0
Sample_70	62.4101	1101164	2278710	2275034	1098301	6	9	0	3	1	2	5	0	2.5	6753209	4900	33090724100	6.34619e-10	1.511e-10
Sample_73	39.4708	1102068	2280242	2276962	1099211	5	5	1	2	3	0	2	1	1.66667	6758483	4900	33116566700	4.83142e-10	9.05891e-11
Sample_74	82.8327	1103319	2282788	2279290	1100456	6	0	0	2	2	0	3	1	1.5	6765853	4900	33152679700	3.01635e-10	1.20654e-10
Sample_75	62.5966	1102708	2281421	2277859	1099786	10	3	1	5	4	2	0	1	1.08333	6761774	4900	33132692600	7.54542e-10	3.01817e-11
Sample_77	115.066	1101693	2280082	2276387	1098903	4	3	0	6	6	0	6	0	0.583333	6757065	4900	33109618500	5.73851e-10	1.81216e-10
Sample_78	120.205	1103063	2282690	2279089	1100238	6	3	1	6	5	0	3	1	0.75	6765080	4900	33148892000	6.33505e-10	1.20668e-10
SUM	-	-	-	-	-	302	209	14	173	111	47	141	66	-	-	-	-	-	-
AVERAGE	125.837	-	-	-	-	6.16327	4.26531	0.285714	3.53061	2.26531	0.959184	2.87755	1.34694	1.72306	6765799	4900	33152415100	5.26942e-10	1.27426e-10
SEMb	6.44494	-	-	-	-	0.357556	0.337275	0.0714286	0.273709	0.241832	0.136648	0.326849	0.176297	0.128806	514.501	-	2.52106e+06	1.93075e-11	1.07808e-11
a Ts/Tv is the transition/transversion ratio.
b SEM is the standart error.
