# Supplementary material for: The Rate and Spectrum of Spontaneous Mutations in Mycobacterium smegmatis, a Bacterium Naturally Devoid of the Postreplicative Mismatch Repair Pathway
Source: G3 (Bethesda). 2016 May 17;6(7):2157–63. doi: 10.1534/g3.116.030130 (PMC4938668; doi:10.1534/g3.116.030130)
Supplement: Supplemental Material [file supp_g3.116.030130_TableS2.xlsx]

## Sheet: S2
Suppl. Table 2. Base substitution details
Samples	Position	Mutation	Genic region*	Reading frame	Strand	Codon change	Amino acid change	Gene**	nonsyn/syn***
Sample_1	MC2_155:345140	T>C	Coding	344359:345534	+	ATC>ACC	I>T	-	nonsyn
Sample_1	MC2_155:844129	A>G	Coding	843822:844316	+	GAC>GGC	D>G	-	nonsyn
Sample_1	MC2_155:1311136	T>C	Coding	1309929:1311629	+	TTA>TCA	L>S	-	nonsyn
Sample_1	MC2_155:1557727	A>G	Noncoding
Sample_1	MC2_155:2146105	C>T	Coding	2145992:2146393	-	GAC>AAC	D>N	-	nonsyn
Sample_1	MC2_155:2825175	C>T	Coding	2824986:2825414	-	ATG>ATA	M>I	-	nonsyn
Sample_1	MC2_155:3450519	C>T	Coding	3450262:3451143	+	CTC>CTT	L>L	-	syn
Sample_1	MC2_155:3776567	T>C	Coding	3776362:3777747	-	CAG>CGG	Q>R	-	nonsyn
Sample_1	MC2_155:4215932	G>T	Coding	4215488:4216381	+	GCC>TCC	A>S	-	nonsyn
Sample_1	MC2_155:4215937	C>A	Coding	4215488:4216381	+	GGC>GGA	G>G	-	syn
Sample_1	MC2_155:4215958	A>C	Coding	4215488:4216381	+	GGA>GGC	G>G	-	syn
Sample_1	MC2_155:4323426	C>G	Noncoding
Sample_1	MC2_155:4325500	G>T	Coding	4325074:4326132	+	GCC>TCC	A>S	idsA2	nonsyn
Sample_1	MC2_155:4859861	G>A	Coding	4854611:4863880	-	ACC>ACT	T>T	-	syn
Sample_1	MC2_155:5146704	C>T	Coding	5145434:5147140	-	CGC>CAC	R>H	-	nonsyn
Sample_1	MC2_155:5330308	C>A	Coding	5330068:5330892	-	GCG>GCT	A>A	-	syn
Sample_1	MC2_155:5474041	G>A	Coding	5473944:5474810	+	TGG>TAG	W>*	-	nonsyn
Sample_1	MC2_155:5530303	T>C	Coding	5530212:5531117	+	CTC>CCC	L>P	-	nonsyn
Sample_1	MC2_155:5741887	A>G	Coding	5740668:5742356	-	GTC>GCC	V>A	-	nonsyn
Sample_1	MC2_155:5785011	T>C	Coding	5784998:5785408	+	CTT>CCT	L>P	-	nonsyn
Sample_1	MC2_155:5834891	T>C	Coding	5834308:5835576	+	GTG>GCG	V>A	-	nonsyn
Sample_1	MC2_155:5994607	T>C	Noncoding
Sample_1	MC2_155:6081719	G>A	Coding	6081375:6082331	+	ACG>ACA	T>T	fadE32	syn
Sample_1	MC2_155:6451412	G>T	Coding	6448854:6452138	+	ACG>ACT	T>T	embA	syn
Sample_1	MC2_155:6542676	T>C	Coding	6542182:6543594	-	AGC>GGC	S>G	cyp138	nonsyn
Sample_5	MC2_155:219379	A>T	Coding	218459:219424	+	GTA>GTT	V>V	-	syn
Sample_5	MC2_155:397096	G>T	Coding	395645:397225	+	TCG>TCT	S>S	-	syn
Sample_5	MC2_155:634136	G>A	Coding	633750:634541	+	CTG>CTA	L>L	-	syn
Sample_5	MC2_155:713003	G>A	Coding	712799:713602	-	ACC>ACT	T>T	-	syn
Sample_5	MC2_155:787366	C>T	Coding	787196:787609	-	GCG>ACG	A>T	-	nonsyn
Sample_5	MC2_155:916291	G>T	Coding	914951:916633	+	CTG>CTT	L>L	-	syn
Sample_5	MC2_155:974645	C>T	Coding	974479:975036	+	GCC>GTC	A>V	-	nonsyn
Sample_5	MC2_155:1702724	C>T	Coding	1702475:1703275	+	CCC>TCC	P>S	-	nonsyn
Sample_5	MC2_155:1707634	C>A	Coding	1707230:1708462	-	GCG>TCG	A>S	-	nonsyn
Sample_5	MC2_155:2196235	C>A	Coding	2195473:2196630	+	CAG>AAG	Q>K	nagA	nonsyn
Sample_5	MC2_155:2630658	G>C	Coding	2629810:2630703	+	CCG>CCC	P>P	-	syn
Sample_5	MC2_155:2678201	G>A	Coding	2677319:2679124	-	TAC>TAT	Y>Y	-	syn
Sample_5	MC2_155:2717172	A>G	Coding	2716559:2717668	-	CTG>CCG	L>P	-	nonsyn
Sample_5	MC2_155:3639702	C>A	Coding	3639637:3641769	+	GTC>GTA	V>V	-	syn
Sample_5	MC2_155:3687405	G>C	Coding	3687002:3687643	-	TCC>TGC	S>C	-	nonsyn
Sample_5	MC2_155:3853348	G>T	Coding	3852319:3853356	+	GCG>TCG	A>S	-	nonsyn
Sample_5	MC2_155:4198140	C>A	Coding	4197805:4198695	-	GTC>TTC	V>F	-	nonsyn
Sample_5	MC2_155:4507390	C>T	Coding	4507337:4508305	+	CTC>CTT	L>L	-	syn
Sample_5	MC2_155:4800217	T>C	Noncoding
Sample_5	MC2_155:4960778	C>T	Coding	4960716:4962479	-	GCA>ACA	A>T	-	nonsyn
Sample_5	MC2_155:5130704	G>T	Coding	5130290:5130940	-	GTC>GTA	V>V	-	syn
Sample_5	MC2_155:5761109	C>A	Coding	5759854:5761413	+	TCG>TAG	S>*	-	nonsyn
Sample_5	MC2_155:6143822	G>A	Coding	6143412:6143972	+	GTG>GTA	V>V	-	syn
Sample_5	MC2_155:6214854	C>T	Coding	6214807:6214980	+	GCC>GCT	A>A	-	syn
Sample_5	MC2_155:6524468	T>C	Coding	6523741:6528363	-	AAG>AGG	K>R	gltB	nonsyn
Sample_6	MC2_155:145059	A>G	Noncoding
Sample_6	MC2_155:238749	A>G	Coding	237671:238768	-	GTG>GCG	V>A	-	nonsyn
Sample_6	MC2_155:500561	A>G	Noncoding
Sample_6	MC2_155:855850	C>T	Coding	855500:856717	+	GTC>GTT	V>V	metZ	syn
Sample_6	MC2_155:1254056	G>A	Coding	1253466:1255373	-	CCC>TCC	P>S	-	nonsyn
Sample_6	MC2_155:1560059	C>T	Coding	1559280:1560755	+	GGC>GGT	G>G	-	syn
Sample_6	MC2_155:1999006	C>T	Coding	1998640:1999287	+	CGC>TGC	R>C	rpoE	nonsyn
Sample_6	MC2_155:2473606	C>G	Coding	2473082:2473708	+	GCC>GCG	A>A	hup	syn
Sample_6	MC2_155:2473618	C>G	Coding	2473082:2473708	+	GCC>GCG	A>A	hup	syn
Sample_6	MC2_155:2473619	G>A	Coding	2473082:2473708	+	GCC>ACC	A>T	hup	nonsyn
Sample_6	MC2_155:2537216	C>A	Coding	2537120:2537716	-	GCG>GCT	A>A	-	syn
Sample_6	MC2_155:2704263	G>A	Coding	2703581:2704285	+	TGC>TAC	C>Y	-	nonsyn
Sample_6	MC2_155:2747183	A>C	Noncoding
Sample_6	MC2_155:2747185	A>C	Noncoding
Sample_6	MC2_155:3064506	A>G	Coding	3063988:3064647	-	TCC>CCC	S>P	-	nonsyn
Sample_6	MC2_155:3180859	T>C	Coding	3179141:3181231	-	ACC>GCC	T>A	tkt	nonsyn
Sample_6	MC2_155:3543716	A>C	Coding	3543322:3543930	-	GTC>GGC	V>G	-	nonsyn
Sample_6	MC2_155:3912971	T>G	Coding	3910381:3913107	-	CAG>CCG	Q>P	polA	nonsyn
Sample_6	MC2_155:3934900	A>G	Coding	3933937:3935529	-	TGT>TGC	C>C	-	syn
Sample_6	MC2_155:4371438	G>C	Coding	4370633:4371541	+	GGG>GCG	G>A	-	nonsyn
Sample_6	MC2_155:4479132	C>T	Coding	4477531:4479225	+	CTC>CTT	L>L	-	syn
Sample_6	MC2_155:4702050	T>C	Coding	4701764:4702183	-	CAA>CGA	Q>R	-	nonsyn
Sample_8	MC2_155:395642	G>A	Noncoding
Sample_8	MC2_155:647857	C>T	Coding	647655:647951	-	GGA>GAA	G>E	-	nonsyn
Sample_8	MC2_155:974308	C>G	Coding	972934:974424	-	GCG>GCC	A>A	pknF	syn
Sample_8	MC2_155:2997415	G>A	Coding	2996840:2997457	+	GCG>GCA	A>A	-	syn
Sample_8	MC2_155:3726269	G>A	Coding	3725115:3726614	-	CAC>TAC	H>Y	-	nonsyn
Sample_8	MC2_155:3790094	C>T	Coding	3789287:3790510	-	CGG>CGA	R>R	-	syn
Sample_8	MC2_155:4058712	A>C	Coding	4058012:4059643	+	GAC>GCC	D>A	-	nonsyn
Sample_8	MC2_155:4189478	T>C	Coding	4188255:4189694	-	ATC>GTC	I>V	-	nonsyn
Sample_8	MC2_155:4189596	G>C	Coding	4188255:4189694	-	CGC>CGG	R>R	-	syn
Sample_8	MC2_155:4189599	G>T	Coding	4188255:4189694	-	TCC>TCA	S>S	-	syn
Sample_8	MC2_155:4189619	G>A	Coding	4188255:4189694	-	CTG>TTG	L>L	-	syn
Sample_8	MC2_155:4189623	G>T	Coding	4188255:4189694	-	GCC>GCA	A>A	-	syn
Sample_8	MC2_155:4189626	A>C	Coding	4188255:4189694	-	CTT>CTG	L>L	-	syn
Sample_8	MC2_155:4296919	T>C	Coding	4295798:4297477	+	GGT>GGC	G>G	-	syn
Sample_8	MC2_155:4500626	C>A	Coding	4500077:4500676	-	CGG>CGT	R>R	-	syn
Sample_8	MC2_155:5293292	A>G	Coding	5293276:5294301	-	GTC>GCC	V>A	-	nonsyn
Sample_8	MC2_155:6252193	C>T	Coding	6252167:6252871	-	GGC>AGC	G>S	-	nonsyn
Sample_8	MC2_155:6791985	G>A	Coding	6791913:6792656	+	GGG>AGG	G>R	-	nonsyn
Sample_8	MC2_155:6794571	A>C	Coding	6793889:6794806	+	GAC>GCC	D>A	-	nonsyn
Sample_8	MC2_155:6797886	G>C	Coding	6797515:6797901	+	ACG>ACC	T>T	-	syn
Sample_9	MC2_155:119398	T>C	Coding	118916:119551	+	GAT>GAC	D>D	-	syn
Sample_9	MC2_155:119542	T>C	Coding	118916:119551	+	CTT>CTC	L>L	-	syn
Sample_9	MC2_155:712546	A>G	Coding	711986:712750	+	GTA>GTG	V>V	tam	syn
Sample_9	MC2_155:1593741	G>C	Coding	1593037:1594542	+	AAG>AAC	K>N	-	nonsyn
Sample_9	MC2_155:1842830	C>A	Coding	1842476:1842913	+	CGT>AGT	R>S	-	nonsyn
Sample_9	MC2_155:3097580	C>A	Coding	3097241:3098005	-	GTG>GTT	V>V	-	syn
Sample_9	MC2_155:3557630	C>T	Noncoding
Sample_9	MC2_155:4967285	G>T	Coding	4966819:4968459	+	CGG>CTG	R>L	-	nonsyn
Sample_9	MC2_155:5444020	G>A	Coding	5443843:5444607	+	GAC>AAC	D>N	-	nonsyn
Sample_9	MC2_155:6093453	T>C	Coding	6093005:6094939	-	GAC>GGC	D>G	-	nonsyn
Sample_9	MC2_155:6103034	G>A	Coding	6101981:6103438	-	GGC>GGT	G>G	-	syn
Sample_9	MC2_155:6274448	C>T	Coding	6274407:6275630	-	GGG>AGG	G>R	-	nonsyn
Sample_9	MC2_155:6290121	C>A	Coding	6288891:6290405	+	CTG>ATG	L>M	-	nonsyn
Sample_9	MC2_155:6326527	G>A	Noncoding
Sample_9	MC2_155:6565589	G>A	Coding	6565529:6565972	+	GCA>ACA	A>T	-	nonsyn
Sample_9	MC2_155:6579231	T>G	Coding	6578299:6579624	-	AGC>CGC	S>R	pep2	nonsyn
Sample_9	MC2_155:6706478	T>C	Coding	6706322:6706738	-	GCA>GCG	A>A	-	syn
Sample_10	MC2_155:1460982	C>G	Coding	1460879:1461271	+	ACC>AGC	T>S	rplL	nonsyn
Sample_10	MC2_155:1525030	G>A	Coding	1524984:1526162	+	CGC>CAC	R>H	pqqE	nonsyn
Sample_10	MC2_155:1716713	G>T	Coding	1716467:1717354	+	GCC>TCC	A>S	-	nonsyn
Sample_10	MC2_155:2243704	A>C	Coding	2243587:2244621	+	ACC>CCC	T>P	-	nonsyn
Sample_10	MC2_155:2544188	G>T	Coding	2542575:2544926	+	GAG>GAT	E>D	-	nonsyn
Sample_10	MC2_155:2574467	C>T	Coding	2573198:2574634	+	CGC>TGC	R>C	-	nonsyn
Sample_10	MC2_155:3603686	C>T	Coding	3603530:3604423	-	AAG>AAA	K>K	-	syn
Sample_10	MC2_155:3812446	A>G	Coding	3811525:3813303	-	CGT>CGC	R>R	pyrG	syn
Sample_10	MC2_155:4059288	A>G	Coding	4058012:4059643	+	CAT>CGT	H>R	-	nonsyn
Sample_10	MC2_155:4179643	G>A	Coding	4178781:4179689	-	GCG>GTG	A>V	-	nonsyn
Sample_10	MC2_155:4324108	A>C	Coding	4323543:4324151	+	GAC>GCC	D>A	-	nonsyn
Sample_10	MC2_155:4559796	C>G	Coding	4558285:4560207	+	TAC>TAG	Y>*	-	nonsyn
Sample_10	MC2_155:4706031	C>A	Coding	4705275:4706123	+	CTG>ATG	L>M	-	nonsyn
Sample_10	MC2_155:5174557	G>A	Noncoding
Sample_10	MC2_155:5687834	T>C	Noncoding
Sample_10	MC2_155:6925509	C>T	Coding	6924162:6925664	-	GAG>GAA	E>E	-	syn
Sample_12	MC2_155:5227	A>G	Coding	4234:5388	+	ACC>GCC	T>A	recF	nonsyn
Sample_12	MC2_155:63588	A>G	Coding	62996:65158	+	GAC>GGC	D>G	-	nonsyn
Sample_12	MC2_155:237656	T>C	Coding	237392:237670	+	TGG>CGG	W>R	-	nonsyn
Sample_12	MC2_155:470008	T>C	Coding	468835:470010	+	TGA>CGA	*>R	ecf	nonsyn
Sample_12	MC2_155:470009	G>T	Coding	468835:470010	+	TGA>TTA	*>L	ecf	nonsyn
Sample_12	MC2_155:470010	A>C	Noncoding
Sample_12	MC2_155:470011	C>A	Noncoding
Sample_12	MC2_155:1341088	T>G	Coding	1339458:1344461	+	GTC>GGC	V>G	-	nonsyn
Sample_12	MC2_155:1372943	G>T	Coding	1369647:1372994	+	CAG>CAT	Q>H	-	nonsyn
Sample_12	MC2_155:1483006	A>C	Coding	1482516:1483220	-	ATG>AGG	M>R	-	nonsyn
Sample_12	MC2_155:1710773	T>G	Coding	1710749:1710955	-	CCA>CCC	P>P	-	syn
Sample_12	MC2_155:2174287	C>T	Coding	2173888:2174631	-	ATG>ATA	M>I	-	nonsyn
Sample_12	MC2_155:3276299	G>A	Coding	3276140:3276376	+	GTG>ATG	V>M	-	nonsyn
Sample_12	MC2_155:4936876	A>G	Noncoding
Sample_12	MC2_155:5605463	T>G	Coding	5604304:5605887	-	CAC>CCC	H>P	purH	nonsyn
Sample_12	MC2_155:6029396	G>A	Coding	6028159:6029448	-	GCT>GTT	A>V	-	nonsyn
Sample_12	MC2_155:6040333	T>C	Coding	6039645:6040655	-	TAT>TGT	Y>C	-	nonsyn
Sample_13	MC2_155:59547	C>G	Noncoding
Sample_13	MC2_155:236970	G>T	Noncoding
Sample_13	MC2_155:1745077	G>A	Coding	1744911:1746455	+	CGG>CAG	R>Q	-	nonsyn
Sample_13	MC2_155:2021898	G>A	Coding	2018900:2022037	+	CGC>CAC	R>H	-	nonsyn
Sample_13	MC2_155:2759562	C>A	Coding	2758876:2760282	-	GCC>TCC	A>S	-	nonsyn
Sample_13	MC2_155:3060984	T>C	Coding	3060209:3061432	-	AAC>AGC	N>S	-	nonsyn
Sample_13	MC2_155:3267166	A>G	Coding	3265411:3267528	-	GGT>GGC	G>G	glgX	syn
Sample_13	MC2_155:3390312	C>G	Coding	3390238:3391539	+	GCC>GCG	A>A	-	syn
Sample_13	MC2_155:3596021	C>T	Coding	3595683:3597140	+	CTC>CTT	L>L	-	syn
Sample_13	MC2_155:4731501	G>T	Noncoding
Sample_13	MC2_155:4877232	G>A	Coding	4876611:4877801	-	GGC>GGT	G>G	-	syn
Sample_13	MC2_155:5228400	T>C	Coding	5227427:5230042	-	GAT>GGT	D>G	fbiC	nonsyn
Sample_13	MC2_155:5231577	C>A	Coding	5231410:5231814	-	GGA>TGA	G>*	-	nonsyn
Sample_13	MC2_155:5485233	G>T	Coding	5484164:5486035	+	AGC>ATC	S>I	-	nonsyn
Sample_13	MC2_155:5785562	G>A	Coding	5785405:5786490	+	CGC>CAC	R>H	moaA2	nonsyn
Sample_13	MC2_155:5875757	G>T	Coding	5875745:5876428	+	GCC>TCC	A>S	-	nonsyn
Sample_13	MC2_155:6378541	C>A	Coding	6378388:6379605	-	TGG>TGT	W>C	-	nonsyn
Sample_13	MC2_155:6434017	C>A	Coding	6433331:6434233	+	TAC>TAA	Y>*	-	nonsyn
Sample_13	MC2_155:6447352	C>T	Coding	6445538:6448762	+	CGC>CGT	R>R	embC	syn
Sample_13	MC2_155:6499713	T>C	Noncoding
Sample_13	MC2_155:6721163	C>A	Coding	6720223:6721248	-	GGA>GTA	G>V	-	nonsyn
Sample_14	MC2_155:190432	C>A	Coding	190037:191413	-	GCC>TCC	A>S	-	nonsyn
Sample_14	MC2_155:1265104	T>G	Coding	1264811:1266802	-	ACC>CCC	T>P	-	nonsyn
Sample_14	MC2_155:1453014	A>G	Coding	1452802:1453362	-	TGC>CGC	C>R	-	nonsyn
Sample_14	MC2_155:1492591	G>A	Coding	1492070:1493008	+	ATG>ATA	M>I	echA4	nonsyn
Sample_14	MC2_155:1792456	C>T	Coding	1792340:1793449	+	GCC>GCT	A>A	-	syn
Sample_14	MC2_155:2305180	A>G	Coding	2304667:2305842	+	ATG>GTG	M>V	-	nonsyn
Sample_14	MC2_155:2431377	G>A	Coding	2430273:2431478	-	ACC>ACT	T>T	-	syn
Sample_14	MC2_155:2620246	C>T	Noncoding
Sample_14	MC2_155:3206267	T>C	Noncoding
Sample_14	MC2_155:3692834	T>C	Noncoding
Sample_14	MC2_155:4011309	G>A	Coding	4010921:4012723	-	TCC>TTC	S>F	devS	nonsyn
Sample_14	MC2_155:4360879	G>T	Coding	4360776:4361501	+	GGC>GTC	G>V	cobS	nonsyn
Sample_14	MC2_155:4687057	C>T	Noncoding
Sample_14	MC2_155:4710718	G>T	Coding	4710714:4710980	-	GCC>GAC	A>D	-	nonsyn
Sample_14	MC2_155:4737522	A>G	Coding	4736714:4737718	-	ATG>ACG	M>T	-	nonsyn
Sample_14	MC2_155:5162510	G>A	Coding	5161724:5162560	-	AAC>AAT	N>N	sugB	syn
Sample_14	MC2_155:6276257	T>C	Coding	6276228:6277025	+	CTT>CTC	L>L	-	syn
Sample_14	MC2_155:6633596	C>G	Coding	6632739:6634292	+	GGC>GGG	G>G	-	syn
Sample_14	MC2_155:6848734	A>C	Coding	6848163:6849161	-	GTG>GGG	V>G	-	nonsyn
Sample_14	MC2_155:6915989	G>A	Coding	6915966:6916964	+	CCG>CCA	P>P	-	syn
Sample_15	MC2_155:15343	T>C	Coding	14920:15750	+	TCG>CCG	S>P	-	nonsyn
Sample_15	MC2_155:605993	A>G	Coding	605689:607287	+	TAC>TGC	Y>C	-	nonsyn
Sample_15	MC2_155:626499	G>A	Coding	626335:627213	+	CCG>CCA	P>P	-	syn
Sample_15	MC2_155:675192	A>G	Noncoding
Sample_15	MC2_155:1555486	A>C	Coding	1554528:1556183	-	GTG>GGG	V>G	-	nonsyn
Sample_15	MC2_155:1623132	G>A	Coding	1622263:1623672	+	ACG>ACA	T>T	-	syn
Sample_15	MC2_155:1999847	C>T	Coding	1999800:2000015	+	GTC>GTT	V>V	-	syn
Sample_15	MC2_155:2054519	A>C	Coding	2054368:2055996	+	TAC>TCC	Y>S	-	nonsyn
Sample_15	MC2_155:4084185	G>A	Coding	4084185:4085198	+	GTG>ATG	M>M	-	syn
Sample_15	MC2_155:4091796	G>A	Coding	4091437:4092192	-	CTT>TTT	L>F	-	nonsyn
Sample_15	MC2_155:4571133	G>A	Coding	4570795:4571157	+	GCG>GCA	A>A	-	syn
Sample_15	MC2_155:4579941	G>A	Coding	4578923:4579969	-	TCG>TTG	S>L	-	nonsyn
Sample_15	MC2_155:4665711	G>A	Coding	4665267:4666220	-	TCC>TCT	S>S	-	syn
Sample_15	MC2_155:4815400	G>A	Coding	4814914:4816251	-	GCC>GCT	A>A	-	syn
Sample_15	MC2_155:5069500	G>A	Coding	5068677:5069564	+	GGC>GAC	G>D	-	nonsyn
Sample_15	MC2_155:5272843	C>T	Noncoding
Sample_15	MC2_155:5708727	T>C	Coding	5708083:5709234	-	AAG>GAG	K>E	-	nonsyn
Sample_15	MC2_155:6060954	A>C	Coding	6060528:6061691	-	GGT>GGG	G>G	-	syn
Sample_15	MC2_155:6416843	A>T	Coding	6416183:6417079	-	TTT>TTA	F>L	-	nonsyn
Sample_15	MC2_155:6811096	G>A	Coding	6810949:6811791	-	TTC>TTT	F>F	-	syn
Sample_17	MC2_155:748123	A>G	Coding	747526:749187	+	ATC>GTC	I>V	-	nonsyn
Sample_17	MC2_155:1413615	C>T	Coding	1412790:1414439	-	ACG>ACA	T>T	-	syn
Sample_17	MC2_155:2002181	A>G	Noncoding
Sample_17	MC2_155:2203882	T>C	Coding	2203454:2204206	-	ACG>GCG	T>A	-	nonsyn
Sample_17	MC2_155:2322692	C>T	Coding	2321976:2322716	-	GGA>AGA	G>R	-	nonsyn
Sample_17	MC2_155:2660996	C>T	Coding	2660024:2661382	-	ACG>ACA	T>T	-	syn
Sample_17	MC2_155:3241429	C>A	Coding	3241251:3241751	-	CGG>CTG	R>L	-	nonsyn
Sample_17	MC2_155:4309824	G>A	Coding	4309149:4310306	-	CTC>CTT	L>L	murG	syn
Sample_17	MC2_155:4731607	A>C	Noncoding
Sample_17	MC2_155:5197172	A>C	Noncoding
Sample_17	MC2_155:5360419	G>A	Coding	5360303:5360920	-	CCG>TCG	P>S	pra	nonsyn
Sample_17	MC2_155:5636819	T>C	Coding	5636749:5638509	+	GTC>GCC	V>A	-	nonsyn
Sample_17	MC2_155:5921329	A>G	Noncoding
Sample_17	MC2_155:5979757	C>A	Coding	5979402:5980598	-	TGC>TTC	C>F	cyp142	nonsyn
Sample_17	MC2_155:6038375	C>T	Coding	6037468:6038844	+	TCG>TTG	S>L	-	nonsyn
Sample_17	MC2_155:6778470	C>A	Coding	6777507:6778556	+	CTG>ATG	L>M	-	nonsyn
Sample_17	MC2_155:6899105	C>G	Coding	6898069:6899223	-	CGG>CCG	R>P	-	nonsyn
Sample_19	MC2_155:214760	A>G	Coding	214609:215781	-	CTC>CCC	L>P	-	nonsyn
Sample_19	MC2_155:653045	G>T	Coding	651588:654479	+	TCG>TCT	S>S	mmpL6	syn
Sample_19	MC2_155:1471997	G>T	Noncoding
Sample_19	MC2_155:3041591	G>A	Coding	3041499:3042362	-	CTC>TTC	L>F	ppiB	nonsyn
Sample_19	MC2_155:3655212	T>C	Coding	3654054:3655493	+	TAC>CAC	Y>H	-	nonsyn
Sample_19	MC2_155:4467688	G>A	Coding	4467215:4467835	+	CTG>CTA	L>L	-	syn
Sample_19	MC2_155:4959496	A>C	Coding	4959391:4960701	-	GGT>GGG	G>G	-	syn
Sample_19	MC2_155:5371761	T>C	Coding	5371611:5373389	+	TGG>CGG	W>R	-	nonsyn
Sample_19	MC2_155:5411309	T>C	Noncoding
Sample_19	MC2_155:5900847	T>C	Coding	5900209:5900883	-	ACG>GCG	T>A	purQ	nonsyn
Sample_19	MC2_155:6103618	C>T	Noncoding
Sample_20	MC2_155:195089	G>A	Noncoding
Sample_20	MC2_155:501330	C>T	Coding	500565:501500	-	GCG>GCA	A>A	-	syn
Sample_20	MC2_155:1238418	C>T	Coding	1237019:1238542	+	GCG>GTG	A>V	-	nonsyn
Sample_20	MC2_155:1303269	A>G	Coding	1303109:1303489	-	CTG>CCG	L>P	-	nonsyn
Sample_20	MC2_155:2144848	A>G	Noncoding
Sample_20	MC2_155:2500246	T>C	Coding	2499894:2500631	+	GTC>GCC	V>A	-	nonsyn
Sample_20	MC2_155:2537764	A>G	Noncoding
Sample_20	MC2_155:2599792	G>A	Coding	2598880:2600043	+	GCC>ACC	A>T	-	nonsyn
Sample_20	MC2_155:4428620	C>A	Coding	4428562:4430202	-	AGC>ATC	S>I	-	nonsyn
Sample_20	MC2_155:4433730	C>T	Coding	4432413:4433786	+	CGC>TGC	R>C	-	nonsyn
Sample_20	MC2_155:4937011	A>G	Coding	4936914:4937039	+	GAG>GGG	E>G	-	nonsyn
Sample_20	MC2_155:5421788	G>A	Coding	5421088:5422209	-	GCG>GTG	A>V	-	nonsyn
Sample_20	MC2_155:5612756	T>C	Coding	5611233:5612756	-	ATG>GTG	M>M	-	syn
Sample_20	MC2_155:5736385	G>T	Coding	5736180:5736908	-	CCG>CAG	P>Q	-	nonsyn
Sample_20	MC2_155:6625559	G>T	Coding	6625332:6625826	-	CCC>ACC	P>T	-	nonsyn
Sample_23	MC2_155:1595156	T>C	Noncoding
Sample_23	MC2_155:2619752	C>T	Coding	2619266:2619958	-	ACG>ACA	T>T	-	syn
Sample_23	MC2_155:2671000	C>A	Coding	2670511:2671368	+	CAC>AAC	H>N	map	nonsyn
Sample_23	MC2_155:2897105	C>T	Noncoding
Sample_23	MC2_155:2975386	C>T	Coding	2975175:2976524	+	ACC>ATC	T>I	-	nonsyn
Sample_23	MC2_155:3001701	C>T	Coding	3001327:3002238	+	ATC>ATT	I>I	pdxS	syn
Sample_23	MC2_155:3180273	A>C	Coding	3179141:3181231	-	CTC>CGC	L>R	tkt	nonsyn
Sample_23	MC2_155:3217131	G>A	Coding	3216708:3217322	-	CGC>CGT	R>R	-	syn
Sample_23	MC2_155:3279188	C>A	Coding	3279163:3280254	+	CCT>CAT	P>H	nadA	nonsyn
Sample_23	MC2_155:3447111	C>A	Coding	3446117:3447223	-	AGT>ATT	S>I	-	nonsyn
Sample_23	MC2_155:3458150	G>A	Coding	3457090:3458529	-	ACA>ATA	T>I	-	nonsyn
Sample_23	MC2_155:3507605	C>T	Coding	3507421:3507747	+	GCC>GTC	A>V	-	nonsyn
Sample_23	MC2_155:4096035	A>G	Noncoding
Sample_23	MC2_155:4623186	G>A	Noncoding
Sample_23	MC2_155:5114505	C>G	Coding	5114371:5115195	-	GGC>CGC	G>R	-	nonsyn
Sample_23	MC2_155:5181524	A>C	Coding	5181373:5182536	+	CAC>CCC	H>P	glgA	nonsyn
Sample_23	MC2_155:5366051	C>T	Coding	5365240:5366193	+	GCC>GTC	A>V	-	nonsyn
Sample_23	MC2_155:6397837	C>T	Coding	6397712:6398314	-	GTG>ATG	V>M	-	nonsyn
Sample_23	MC2_155:6595242	G>A	Coding	6593645:6595840	+	AGG>AAG	R>K	-	nonsyn
Sample_23	MC2_155:6631137	T>C	Coding	6631017:6632246	+	TAC>CAC	Y>H	est	nonsyn
Sample_23	MC2_155:6798443	G>A	Coding	6797905:6798894	-	GCC>GTC	A>V	celA	nonsyn
Sample_23	MC2_155:6983084	G>T	Coding	6982241:6983296	-	GAC>GAA	D>E	parB	nonsyn
Sample_23	MC2_155:6983085	T>G	Coding	6982241:6983296	-	GAC>GCC	D>A	parB	nonsyn
Sample_23	MC2_155:6983087	A>T	Coding	6982241:6983296	-	GGT>GGA	G>G	parB	syn
Sample_25	MC2_155:430364	C>T	Coding	430263:433247	+	GTC>GTT	V>V	mmpL4b	syn
Sample_25	MC2_155:682954	T>C	Coding	680991:683195	-	GAG>GGG	E>G	fadE6	nonsyn
Sample_25	MC2_155:797151	C>T	Noncoding
Sample_25	MC2_155:1462785	C>G	Noncoding
Sample_25	MC2_155:1816522	G>A	Noncoding
Sample_25	MC2_155:2072102	C>T	Coding	2071797:2072189	+	TTC>TTT	F>F	-	syn
Sample_25	MC2_155:2339612	T>C	Coding	2338196:2339749	-	GAA>GAG	E>E	-	syn
Sample_25	MC2_155:2502409	G>A	Coding	2502008:2502865	+	GTG>GTA	V>V	mutM	syn
Sample_25	MC2_155:2626540	G>C	Noncoding
Sample_25	MC2_155:3934650	G>A	Coding	3933937:3935529	-	CAG>TAG	Q>*	-	nonsyn
Sample_25	MC2_155:4318761	G>A	Coding	4317699:4319645	-	GTC>GTT	V>V	-	syn
Sample_25	MC2_155:5412903	C>T	Noncoding
Sample_25	MC2_155:5541167	A>G	Coding	5540779:5542284	-	ATC>ACC	I>T	-	nonsyn
Sample_25	MC2_155:5617663	G>A	Noncoding
Sample_25	MC2_155:6827162	C>A	Coding	6827080:6827967	+	GCC>GAC	A>D	-	nonsyn
Sample_25	MC2_155:6954906	G>A	Coding	6954819:6955484	+	GAC>AAC	D>N	-	nonsyn
Sample_26	MC2_155:86189	G>A	Coding	84928:86709	+	AGC>AAC	S>N	-	nonsyn
Sample_26	MC2_155:95573	G>T	Coding	94685:96949	+	GGC>TGC	G>C	-	nonsyn
Sample_26	MC2_155:238477	T>A	Coding	237671:238768	-	AAT>TAT	N>Y	-	nonsyn
Sample_26	MC2_155:370225	C>T	Coding	369834:370769	+	GCC>GTC	A>V	-	nonsyn
Sample_26	MC2_155:542210	A>C	Coding	540154:543039	+	AAC>ACC	N>T	mmpL4	nonsyn
Sample_26	MC2_155:593170	C>T	Coding	592597:593739	+	CGC>TGC	R>C	-	nonsyn
Sample_26	MC2_155:727757	C>A	Coding	726680:728335	-	CCG>CCT	P>P	-	syn
Sample_26	MC2_155:786680	C>T	Coding	784971:786860	+	ATC>ATT	I>I	iniA	syn
Sample_26	MC2_155:1326356	C>T	Coding	1325606:1326520	+	CAG>TAG	Q>*	-	nonsyn
Sample_26	MC2_155:1409782	C>A	Coding	1408482:1410815	+	CCC>CAC	P>H	-	nonsyn
Sample_26	MC2_155:1964735	A>C	Coding	1963181:1965037	+	ACG>CCG	T>P	-	nonsyn
Sample_26	MC2_155:2255920	T>C	Coding	2255058:2256434	-	GAG>GGG	E>G	-	nonsyn
Sample_26	MC2_155:2255921	C>T	Coding	2255058:2256434	-	GAG>AAG	E>K	-	nonsyn
Sample_26	MC2_155:3439052	C>T	Coding	3438568:3439194	+	ACG>ATG	T>M	-	nonsyn
Sample_26	MC2_155:3663605	T>G	Coding	3660496:3663702	+	ATC>AGC	I>S	-	nonsyn
Sample_26	MC2_155:5921215	G>A	Coding	5920028:5921296	-	CTG>TTG	L>L	purD	syn
Sample_26	MC2_155:6197209	C>A	Noncoding
Sample_28	MC2_155:32997	C>A	Coding	20662:43233	+	GGC>GGA	G>G	-	syn
Sample_28	MC2_155:151699	T>G	Coding	151591:152034	+	TGC>GGC	C>G	-	nonsyn
Sample_28	MC2_155:298500	C>T	Coding	298476:299747	+	CTG>TTG	L>L	-	syn
Sample_28	MC2_155:340171	A>C	Coding	339609:340436	+	GAC>GCC	D>A	nat	nonsyn
Sample_28	MC2_155:2280480	G>A	Coding	2278641:2280812	-	GCC>GCT	A>A	-	syn
Sample_28	MC2_155:2338607	A>G	Coding	2338196:2339749	-	CGT>CGC	R>R	-	syn
Sample_28	MC2_155:3172007	G>A	Coding	3171556:3174357	+	GGT>GAT	G>D	-	nonsyn
Sample_28	MC2_155:3370117	A>C	Coding	3369566:3370429	-	TGG>GGG	W>G	-	nonsyn
Sample_28	MC2_155:3487927	C>T	Coding	3487674:3488804	-	GGC>GAC	G>D	-	nonsyn
Sample_28	MC2_155:3878716	T>C	Coding	3878715:3879539	+	TTG>TCG	M>S	-	nonsyn
Sample_28	MC2_155:4455372	C>T	Coding	4454629:4456197	-	GCG>ACG	A>T	pknE	nonsyn
Sample_28	MC2_155:4488635	G>T	Coding	4488609:4488881	+	ATG>ATT	M>I	-	nonsyn
Sample_28	MC2_155:4862036	G>T	Coding	4854611:4863880	-	ATC>ATA	I>I	-	syn
Sample_28	MC2_155:4866387	G>A	Coding	4866340:4867530	+	ACG>ACA	T>T	-	syn
Sample_28	MC2_155:4979637	C>T	Coding	4978028:4979689	-	TGG>TAG	W>*	-	nonsyn
Sample_28	MC2_155:5563423	G>A	Coding	5563156:5563989	-	GCC>GCT	A>A	-	syn
Sample_28	MC2_155:5648106	C>T	Coding	5646946:5648163	+	GTC>GTT	V>V	-	syn
Sample_28	MC2_155:5798366	G>T	Coding	5798049:5799341	+	GCG>GCT	A>A	-	syn
Sample_28	MC2_155:6454224	T>C	Coding	6452135:6455383	+	TTC>TCC	F>S	embB	nonsyn
Sample_28	MC2_155:6674325	T>C	Coding	6673681:6674400	-	ACC>GCC	T>A	-	nonsyn
Sample_29	MC2_155:488308	T>C	Coding	485880:488888	+	TTG>TCG	L>S	mmpL	nonsyn
Sample_29	MC2_155:907195	C>A	Coding	906497:907756	+	GCC>GCA	A>A	-	syn
Sample_29	MC2_155:954526	T>G	Coding	953199:957023	-	GAC>GCC	D>A	-	nonsyn
Sample_29	MC2_155:1238064	C>A	Coding	1237019:1238542	+	GCG>GAG	A>E	-	nonsyn
Sample_29	MC2_155:1561483	C>T	Coding	1561120:1562724	+	CAC>TAC	H>Y	-	nonsyn
Sample_29	MC2_155:1600943	G>C	Coding	1600089:1601198	+	GCG>GCC	A>A	-	syn
Sample_29	MC2_155:2651841	G>A	Coding	2651291:2652028	+	GGA>GAA	G>E	-	nonsyn
Sample_29	MC2_155:2736073	C>T	Coding	2735420:2736397	+	CCC>CCT	P>P	ribF	syn
Sample_29	MC2_155:3868985	C>A	Coding	3868016:3869353	+	CTG>ATG	L>M	-	nonsyn
Sample_29	MC2_155:4888024	G>A	Coding	4886712:4888442	-	CCG>CTG	P>L	-	nonsyn
Sample_29	MC2_155:5401433	G>A	Noncoding
Sample_29	MC2_155:6059104	C>T	Coding	6058011:6059174	-	CGC>CAC	R>H	ltp2	nonsyn
Sample_29	MC2_155:6348861	C>A	Coding	6348326:6349726	+	GCG>GAG	A>E	-	nonsyn
Sample_30	MC2_155:210589	G>T	Coding	210191:213034	-	CCG>ACG	P>T	mmpL6	nonsyn
Sample_30	MC2_155:414164	G>A	Coding	412302:415658	+	GTG>GTA	V>V	-	syn
Sample_30	MC2_155:796701	C>A	Coding	796421:797080	-	GGA>GTA	G>V	-	nonsyn
Sample_30	MC2_155:3080580	T>C	Coding	3080485:3081471	+	CCT>CCC	P>P	lipR	syn
Sample_30	MC2_155:3412840	C>T	Noncoding
Sample_30	MC2_155:3598419	G>A	Coding	3598099:3598629	+	GCG>GCA	A>A	-	syn
Sample_30	MC2_155:4396272	C>A	Coding	4394746:4396302	-	GTC>TTC	V>F	-	nonsyn
Sample_30	MC2_155:4432390	A>G	Noncoding
Sample_30	MC2_155:4504887	A>G	Coding	4504789:4505295	+	GCA>GCG	A>A	-	syn
Sample_30	MC2_155:4988564	G>T	Noncoding
Sample_30	MC2_155:5248261	C>T	Coding	5247450:5248877	-	GGC>GAC	G>D	-	nonsyn
Sample_30	MC2_155:5974350	G>T	Coding	5974215:5975336	-	CCC>CCA	P>P	-	syn
Sample_33	MC2_155:103221	G>A	Noncoding
Sample_33	MC2_155:421058	T>G	Coding	419808:421685	-	ACC>CCC	T>P	-	nonsyn
Sample_33	MC2_155:1070739	C>A	Coding	1069891:1071045	+	CCC>CCA	P>P	-	syn
Sample_33	MC2_155:1763400	T>G	Coding	1762633:1763547	+	GGT>GGG	G>G	sNoncodingJ	syn
Sample_33	MC2_155:1825463	T>A	Coding	1824967:1826160	+	ATC>AAC	I>N	-	nonsyn
Sample_33	MC2_155:2210875	C>T	Coding	2209901:2210971	-	GGC>AGC	G>S	-	nonsyn
Sample_33	MC2_155:2466686	C>T	Coding	2466000:2467193	+	GTC>GTT	V>V	-	syn
Sample_33	MC2_155:3974582	G>A	Coding	3974345:3974878	-	GCC>GCT	A>A	-	syn
Sample_33	MC2_155:4005533	G>T	Coding	4005125:4006480	-	GGC>GGA	G>G	-	syn
Sample_33	MC2_155:4352632	G>T	Coding	4352383:4352802	-	CGC>CGA	R>R	ctaF	syn
Sample_33	MC2_155:5383784	G>T	Noncoding
Sample_33	MC2_155:5586224	A>G	Noncoding
Sample_33	MC2_155:5639713	A>C	Coding	5639596:5640957	+	AAG>CAG	K>Q	-	nonsyn
Sample_33	MC2_155:6572217	G>A	Coding	6571775:6572242	+	CGG>CAG	R>Q	-	nonsyn
Sample_33	MC2_155:6705690	T>C	Noncoding
Sample_33	MC2_155:6775513	A>C	Noncoding
Sample_33	MC2_155:6791509	G>A	Coding	6791015:6791869	+	GTG>GTA	V>V	-	syn
Sample_34	MC2_155:238815	A>G	Noncoding
Sample_34	MC2_155:453204	G>A	Coding	449508:459803	+	GAC>AAC	D>N	mbtH	nonsyn
Sample_34	MC2_155:513411	A>G	Coding	513385:514017	-	TGG>CGG	W>R	-	nonsyn
Sample_34	MC2_155:725099	G>A	Coding	724707:725669	-	CTT>TTT	L>F	-	nonsyn
Sample_34	MC2_155:1364368	C>T	Coding	1364051:1365178	-	GAC>AAC	D>N	-	nonsyn
Sample_34	MC2_155:1463223	G>A	Noncoding
Sample_34	MC2_155:1844057	C>A	Coding	1843867:1844895	-	GGG>GTG	G>V	-	nonsyn
Sample_34	MC2_155:2825877	T>G	Coding	2825732:2826724	-	CAG>CCG	Q>P	-	nonsyn
Sample_34	MC2_155:3130278	C>T	Coding	3129360:3130559	+	CTG>TTG	L>L	metK	syn
Sample_34	MC2_155:3762725	G>T	Coding	3762714:3763166	+	TCG>TCT	S>S	-	syn
Sample_34	MC2_155:5383888	T>C	Noncoding
Sample_34	MC2_155:5984978	G>A	Coding	5984540:5985718	+	GTG>ATG	V>M	ltp3	nonsyn
Sample_34	MC2_155:6354435	G>T	Noncoding
Sample_34	MC2_155:6571686	T>C	Noncoding
Sample_34	MC2_155:6653029	C>A	Coding	6653005:6653979	-	GAG>GAT	E>D	-	nonsyn
Sample_34	MC2_155:6901419	C>A	Coding	6900699:6901631	-	GTG>GTT	V>V	-	syn
Sample_36	MC2_155:442585	T>C	Coding	442370:443260	+	TGT>TGC	C>C	rmt3	syn
Sample_36	MC2_155:623386	T>A	Coding	623363:624403	-	ATC>TTC	I>F	-	nonsyn
Sample_36	MC2_155:891122	G>A	Coding	890735:892276	+	GCC>ACC	A>T	-	nonsyn
Sample_36	MC2_155:1289392	A>G	Coding	1289355:1290071	-	GTC>GCC	V>A	-	nonsyn
Sample_36	MC2_155:2900667	C>T	Coding	2900612:2903014	+	GCC>GTC	A>V	-	nonsyn
Sample_36	MC2_155:3026437	C>A	Coding	3024745:3026607	+	CTG>ATG	L>M	secD	nonsyn
Sample_36	MC2_155:3347249	A>G	Coding	3346495:3347517	-	CTA>CCA	L>P	-	nonsyn
Sample_36	MC2_155:6634399	G>A	Noncoding
Sample_37	MC2_155:958037	C>A	Coding	957935:960100	-	GAG>GAT	E>D	-	nonsyn
Sample_37	MC2_155:1177959	C>T	Coding	1176977:1178104	+	GCG>GTG	A>V	pimB	nonsyn
Sample_37	MC2_155:1340745	G>T	Coding	1339458:1344461	+	GCC>TCC	A>S	-	nonsyn
Sample_37	MC2_155:1554393	G>T	Coding	1553151:1554527	+	GGA>TGA	G>*	-	nonsyn
Sample_37	MC2_155:2054303	A>G	Noncoding
Sample_37	MC2_155:2487746	A>G	Coding	2486261:2488519	+	ACG>GCG	T>A	recG	nonsyn
Sample_37	MC2_155:3335253	G>T	Coding	3334855:3335709	+	CGG>CGT	R>R	-	syn
Sample_37	MC2_155:3448129	G>T	Coding	3447524:3449200	+	TCG>TCT	S>S	-	syn
Sample_37	MC2_155:3991902	G>A	Coding	3991817:3992335	+	CGC>CAC	R>H	-	nonsyn
Sample_37	MC2_155:4007837	G>A	Coding	4007458:4008351	-	CCG>CTG	P>L	-	nonsyn
Sample_37	MC2_155:4386992	T>C	Coding	4386742:4388139	-	CAC>CGC	H>R	-	nonsyn
Sample_37	MC2_155:5155314	G>A	Coding	5154680:5155444	-	GCG>GTG	A>V	-	nonsyn
Sample_37	MC2_155:5438431	G>A	Noncoding
Sample_37	MC2_155:6114524	T>C	Coding	6114081:6114953	-	ATC>GTC	I>V	-	nonsyn
Sample_37	MC2_155:6453186	T>G	Coding	6452135:6455383	+	CTG>CGG	L>R	embB	nonsyn
Sample_37	MC2_155:6523572	G>A	Coding	6522282:6523748	-	TGC>TGT	C>C	gltD	syn
Sample_37	MC2_155:6872430	G>A	Coding	6872349:6873128	+	GGG>AGG	G>R	-	nonsyn
Sample_39	MC2_155:1190810	A>G	Coding	1190494:1191090	+	CAC>CGC	H>R	-	nonsyn
Sample_39	MC2_155:1204672	T>G	Noncoding
Sample_39	MC2_155:2159548	C>T	Coding	2159247:2160467	-	CGC>CAC	R>H	fadE23	nonsyn
Sample_39	MC2_155:2181951	C>T	Noncoding
Sample_39	MC2_155:2183414	C>A	Noncoding
Sample_39	MC2_155:2331443	G>T	Noncoding
Sample_39	MC2_155:3304093	C>T	Coding	3303826:3304239	+	CTC>TTC	L>F	-	nonsyn
Sample_39	MC2_155:3829474	G>C	Coding	3829347:3829913	+	CGC>CCC	R>P	-	nonsyn
Sample_39	MC2_155:4071928	C>T	Coding	4071438:4072808	+	GCG>GTG	A>V	-	nonsyn
Sample_39	MC2_155:4352686	G>C	Coding	4352383:4352802	-	ACC>ACG	T>T	ctaF	syn
Sample_39	MC2_155:4731899	T>C	Coding	4731765:4732376	-	ACG>GCG	T>A	-	nonsyn
Sample_39	MC2_155:4797967	A>C	Coding	4797486:4798952	-	GTC>GGC	V>G	-	nonsyn
Sample_39	MC2_155:4998773	T>C	Coding	4998426:4999163	-	ATC>GTC	I>V	-	nonsyn
Sample_39	MC2_155:5051620	G>T	Coding	5051040:5053097	-	CCG>CAG	P>Q	-	nonsyn
Sample_39	MC2_155:5460189	A>C	Noncoding
Sample_39	MC2_155:5460191	T>C	Noncoding
Sample_39	MC2_155:5675060	T>C	Coding	5674870:5675661	+	GTC>GCC	V>A	-	nonsyn
Sample_39	MC2_155:5682238	T>C	Coding	5681687:5683642	-	ACC>GCC	T>A	-	nonsyn
Sample_39	MC2_155:6074317	G>T	Coding	6073954:6075102	-	CGC>CGA	R>R	fadA6	syn
Sample_41	MC2_155:108654	C>T	Coding	107595:108944	-	GGG>GGA	G>G	-	syn
Sample_41	MC2_155:329612	G>T	Coding	329288:330568	-	CCC>CCA	P>P	-	syn
Sample_41	MC2_155:376188	G>T	Coding	376045:377799	+	AAG>AAT	K>N	-	nonsyn
Sample_41	MC2_155:923060	T>G	Coding	922888:924018	+	CTG>CGG	L>R	-	nonsyn
Sample_41	MC2_155:973525	C>T	Coding	972934:974424	-	GCG>GCA	A>A	pknF	syn
Sample_41	MC2_155:1805995	C>T	Coding	1805113:1806078	-	GCG>GCA	A>A	-	syn
Sample_41	MC2_155:2947254	C>T	Coding	2947043:2948626	-	TGG>TAG	W>*	-	nonsyn
Sample_41	MC2_155:3826783	A>G	Noncoding
Sample_41	MC2_155:4007440	G>T	Noncoding
Sample_41	MC2_155:4046582	C>G	Noncoding
Sample_41	MC2_155:4048673	T>G	Noncoding
Sample_41	MC2_155:4049715	C>A	Coding	4049703:4050125	-	CCG>CCT	P>P	-	syn
Sample_41	MC2_155:4063763	G>C	Coding	4063430:4064707	+	GCC>CCC	A>P	-	nonsyn
Sample_41	MC2_155:4280580	G>T	Noncoding
Sample_41	MC2_155:4566488	A>G	Coding	4565698:4566984	-	GTG>GCG	V>A	dgt	nonsyn
Sample_41	MC2_155:5387074	G>T	Coding	5386897:5388384	-	GTC>GTA	V>V	-	syn
Sample_41	MC2_155:5989486	C>A	Coding	5988238:5989767	-	GAG>GAT	E>D	-	nonsyn
Sample_41	MC2_155:6182788	A>C	Coding	6182112:6182912	-	CTG>CGG	L>R	-	nonsyn
Sample_41	MC2_155:6204342	A>G	Coding	6201614:6205549	+	CAC>CGC	H>R	-	nonsyn
Sample_41	MC2_155:6348009	T>C	Coding	6347799:6348236	-	GGA>GGG	G>G	-	syn
Sample_42	MC2_155:205602	A>G	Coding	205274:205783	-	CTC>CCC	L>P	-	nonsyn
Sample_42	MC2_155:732115	T>G	Coding	731780:732571	-	ACC>CCC	T>P	-	nonsyn
Sample_42	MC2_155:941320	T>C	Coding	940945:941373	-	TTA>TTG	L>L	-	syn
Sample_42	MC2_155:1526747	T>C	Coding	1526165:1527358	+	TGG>CGG	W>R	lldD1	nonsyn
Sample_42	MC2_155:1567342	T>A	Coding	1567307:1567750	+	GCT>GCA	A>A	rplO	syn
Sample_42	MC2_155:1810021	A>G	Noncoding
Sample_42	MC2_155:2204279	G>C	Noncoding
Sample_42	MC2_155:2521082	C>T	Coding	2520726:2521175	+	TGC>TGT	C>C	-	syn
Sample_42	MC2_155:2804732	C>T	Coding	2804200:2805108	+	CCC>CTC	P>L	miaA	nonsyn
Sample_42	MC2_155:3461332	A>T	Noncoding
Sample_42	MC2_155:3722175	G>T	Coding	3721222:3723147	+	GCG>GCT	A>A	-	syn
Sample_42	MC2_155:3985219	A>C	Noncoding
Sample_42	MC2_155:4244619	G>A	Coding	4243922:4244638	-	GCG>GTG	A>V	-	nonsyn
Sample_42	MC2_155:4283181	G>A	Coding	4282081:4283955	-	CGC>TGC	R>C	-	nonsyn
Sample_42	MC2_155:4936874	T>C	Noncoding
Sample_42	MC2_155:5325917	T>C	Noncoding
Sample_42	MC2_155:6188058	A>C	Coding	6187604:6189166	-	GTC>GGC	V>G	-	nonsyn
Sample_42	MC2_155:6278419	A>C	Coding	6278290:6278874	+	ATC>CTC	I>L	-	nonsyn
Sample_43	MC2_155:441226	T>C	Coding	441114:442298	+	GTG>GCG	V>A	atf1	nonsyn
Sample_43	MC2_155:1522270	A>G	Coding	1521255:1522538	-	CTC>CCC	L>P	-	nonsyn
Sample_43	MC2_155:1772360	T>C	Coding	1771570:1772505	+	GTC>GCC	V>A	-	nonsyn
Sample_43	MC2_155:2184443	G>T	Coding	2183651:2184616	-	GGC>GGA	G>G	-	syn
Sample_43	MC2_155:3484834	C>T	Coding	3484190:3485143	-	GAT>AAT	D>N	fadB5	nonsyn
Sample_43	MC2_155:3901621	T>A	Coding	3901454:3902182	+	GAT>GAA	D>E	-	nonsyn
Sample_43	MC2_155:4650404	A>G	Coding	4649473:4651449	-	ATG>ACG	M>T	-	nonsyn
Sample_43	MC2_155:5536128	A>G	Coding	5535993:5537201	-	TAT>TAC	Y>Y	arcA	syn
Sample_43	MC2_155:5878929	G>C	Coding	5878780:5879427	-	CGC>GGC	R>G	-	nonsyn
Sample_43	MC2_155:5891476	G>T	Coding	5891170:5893467	-	GGC>GGA	G>G	purL	syn
Sample_43	MC2_155:6072450	G>T	Coding	6072134:6072880	+	GGG>GTG	G>V	-	nonsyn
Sample_43	MC2_155:6336774	A>G	Coding	6336297:6338105	+	AAG>GAG	K>E	leuA	nonsyn
Sample_43	MC2_155:6561748	G>A	Coding	6561504:6562058	-	GCG>GTG	A>V	-	nonsyn
Sample_43	MC2_155:6620533	C>A	Coding	6620343:6621353	-	GGC>GTC	G>V	-	nonsyn
Sample_43	MC2_155:6731374	T>C	Coding	6731282:6731767	+	CAT>CAC	H>H	-	syn
Sample_44	MC2_155:150620	C>T	Coding	149997:151088	-	GTG>ATG	V>M	adhE1	nonsyn
Sample_44	MC2_155:578445	A>C	Coding	576814:579078	-	TCC>GCC	S>A	-	nonsyn
Sample_44	MC2_155:2251533	T>C	Noncoding
Sample_44	MC2_155:3187576	C>T	Coding	3187230:3188558	-	TGG>TAG	W>*	-	nonsyn
Sample_44	MC2_155:3412740	C>T	Noncoding
Sample_44	MC2_155:3583758	G>A	Coding	3582990:3584120	+	GAG>AAG	E>K	-	nonsyn
Sample_44	MC2_155:3588000	G>A	Coding	3587834:3589120	+	TGG>TAG	W>*	cyp125	nonsyn
Sample_44	MC2_155:3679403	C>A	Coding	3679083:3679694	-	GCC>TCC	A>S	-	nonsyn
Sample_44	MC2_155:4497899	G>C	Coding	4497676:4498095	-	TCG>TGG	S>W	-	nonsyn
Sample_44	MC2_155:4693200	A>G	Coding	4692816:4693658	+	ACC>GCC	T>A	-	nonsyn
Sample_44	MC2_155:4901719	G>A	Noncoding
Sample_44	MC2_155:5413063	T>C	Noncoding
Sample_44	MC2_155:5419807	C>T	Coding	5419766:5421076	-	GCC>ACC	A>T	-	nonsyn
Sample_44	MC2_155:5673220	G>T	Coding	5672893:5674788	-	ATC>ATA	I>I	-	syn
Sample_44	MC2_155:5775008	T>C	Noncoding
Sample_44	MC2_155:6642497	C>T	Coding	6642297:6643274	+	GCC>GCT	A>A	-	syn
Sample_45	MC2_155:108964	A>C	Noncoding
Sample_45	MC2_155:396687	T>G	Coding	395645:397225	+	CTT>CGT	L>R	-	nonsyn
Sample_45	MC2_155:436183	A>G	Coding	435213:436481	+	CAC>CGC	H>R	-	nonsyn
Sample_45	MC2_155:461131	G>A	Coding	459800:467479	+	CAG>CAA	Q>Q	-	syn
Sample_45	MC2_155:630322	G>A	Coding	630102:630884	-	ACC>ATC	T>I	-	nonsyn
Sample_45	MC2_155:995193	A>G	Coding	994871:995242	+	GAC>GGC	D>G	-	nonsyn
Sample_45	MC2_155:1313976	A>G	Coding	1313344:1314930	+	GAA>GAG	E>E	-	syn
Sample_45	MC2_155:1539844	C>A	Coding	1539209:1539862	+	ATC>ATA	I>I	rplC	syn
Sample_45	MC2_155:1587740	G>A	Coding	1587597:1588469	-	CTG>TTG	L>L	-	syn
Sample_45	MC2_155:2608739	C>T	Coding	2608408:2609868	+	GCC>GTC	A>V	amiC	nonsyn
Sample_45	MC2_155:3769112	C>T	Noncoding
Sample_45	MC2_155:3879012	T>A	Coding	3878715:3879539	+	TCG>ACG	S>T	-	nonsyn
Sample_45	MC2_155:4487757	A>G	Coding	4487654:4488547	-	GTG>GCG	V>A	-	nonsyn
Sample_45	MC2_155:4790095	C>A	Coding	4788937:4790610	-	CTG>CTT	L>L	-	syn
Sample_45	MC2_155:5802344	G>A	Noncoding
Sample_46	MC2_155:237739	A>G	Coding	237671:238768	-	TGT>CGT	C>R	-	nonsyn
Sample_46	MC2_155:671797	T>C	Coding	671262:672263	+	ATC>ACC	I>T	-	nonsyn
Sample_46	MC2_155:1150648	C>A	Coding	1149332:1150936	+	TAC>TAA	Y>*	-	nonsyn
Sample_46	MC2_155:1662937	A>G	Coding	1662911:1664374	+	AAA>AAG	K>K	-	syn
Sample_46	MC2_155:1945480	A>C	Noncoding
Sample_46	MC2_155:2040922	C>T	Coding	2038730:2041741	+	GAC>GAT	D>D	-	syn
Sample_46	MC2_155:2185578	G>A	Coding	2185245:2186258	+	GCG>ACG	A>T	-	nonsyn
Sample_46	MC2_155:2355388	C>G	Noncoding
Sample_46	MC2_155:2959005	C>A	Coding	2957998:2959053	-	GAA>TAA	E>*	hmp	nonsyn
Sample_46	MC2_155:4301667	G>A	Coding	4301552:4302370	-	ACC>ATC	T>I	ag84	nonsyn
Sample_46	MC2_155:4414277	C>A	Coding	4413636:4414553	+	AGC>AGA	S>R	fabD	nonsyn
Sample_46	MC2_155:4714845	A>G	Noncoding
Sample_46	MC2_155:4740486	G>A	Coding	4740000:4740869	+	GAC>AAC	D>N	-	nonsyn
Sample_46	MC2_155:5469177	C>A	Coding	5469001:5469840	-	GAC>TAC	D>Y	-	nonsyn
Sample_46	MC2_155:5710843	C>A	Coding	5710168:5712006	-	CCG>CCT	P>P	-	syn
Sample_47	MC2_155:506514	C>T	Noncoding
Sample_47	MC2_155:632114	T>C	Coding	631601:632887	+	TAC>CAC	Y>H	-	nonsyn
Sample_47	MC2_155:1343201	A>G	Coding	1339458:1344461	+	GCA>GCG	A>A	-	syn
Sample_47	MC2_155:3417813	T>G	Coding	3417748:3418230	-	ACC>CCC	T>P	-	nonsyn
Sample_47	MC2_155:3722522	T>C	Coding	3721222:3723147	+	GTC>GCC	V>A	-	nonsyn
Sample_47	MC2_155:3934175	C>A	Coding	3933937:3935529	-	GGT>GTT	G>V	-	nonsyn
Sample_47	MC2_155:4108925	T>C	Coding	4108529:4110178	-	CGA>CGG	R>R	-	syn
Sample_47	MC2_155:4489562	G>A	Coding	4488888:4489643	-	CCG>TCG	P>S	-	nonsyn
Sample_47	MC2_155:5222831	C>A	Coding	5222661:5222984	-	GTC>TTC	V>F	fdxC	nonsyn
Sample_47	MC2_155:5327297	G>A	Coding	5327240:5328010	+	GCC>ACC	A>T	-	nonsyn
Sample_47	MC2_155:5786348	G>A	Coding	5785405:5786490	+	CGG>CAG	R>Q	moaA2	nonsyn
Sample_47	MC2_155:6108816	C>T	Coding	6108480:6109076	+	CGC>TGC	R>C	-	nonsyn
Sample_47	MC2_155:6271604	T>C	Coding	6271603:6272544	+	GTG>GCG	M>A	-	nonsyn
Sample_48	MC2_155:223422	T>G	Coding	222853:223749	+	GGT>GGG	G>G	-	syn
Sample_48	MC2_155:286766	A>G	Coding	286627:287796	+	GAG>GGG	E>G	-	nonsyn
Sample_48	MC2_155:290971	C>T	Coding	289417:291243	+	CGC>TGC	R>C	pckG	nonsyn
Sample_48	MC2_155:327029	G>C	Coding	326927:327670	-	GGC>GGG	G>G	-	syn
Sample_48	MC2_155:669825	A>G	Coding	669797:671254	+	GAC>GGC	D>G	-	nonsyn
Sample_48	MC2_155:746412	T>G	Coding	745537:746694	+	GGT>GGG	G>G	-	syn
Sample_48	MC2_155:769963	G>T	Coding	768283:770397	-	GTC>GTA	V>V	-	syn
Sample_48	MC2_155:802162	C>A	Coding	802105:802464	+	CTC>ATC	L>I	hspR	nonsyn
Sample_48	MC2_155:1727357	A>G	Coding	1727300:1728265	+	ACA>GCA	T>A	-	nonsyn
Sample_48	MC2_155:3676271	G>A	Coding	3675880:3678252	+	GGC>GAC	G>D	-	nonsyn
Sample_48	MC2_155:3680271	G>A	Coding	3679812:3680303	+	GGC>AGC	G>S	-	nonsyn
Sample_48	MC2_155:3980126	C>A	Noncoding
Sample_48	MC2_155:4459946	A>C	Coding	4459382:4460329	-	GGT>GGG	G>G	-	syn
Sample_48	MC2_155:4578126	A>G	Coding	4577023:4578393	-	TGG>CGG	W>R	-	nonsyn
Sample_48	MC2_155:4606360	G>T	Coding	4605449:4607125	+	GCG>GCT	A>A	mbtA	syn
Sample_48	MC2_155:4778884	C>T	Coding	4776333:4778915	+	GCC>GTC	A>V	-	nonsyn
Sample_48	MC2_155:5833061	A>G	Coding	5832944:5833723	+	ACC>GCC	T>A	-	nonsyn
Sample_49	MC2_155:86821	T>C	Noncoding
Sample_49	MC2_155:878836	T>G	Coding	878452:878955	+	TTG>GTG	L>V	mutT3	nonsyn
Sample_49	MC2_155:1065410	G>A	Coding	1065020:1066147	+	GCG>ACG	A>T	-	nonsyn
Sample_49	MC2_155:1935611	T>C	Coding	1935465:1936193	+	GCT>GCC	A>A	-	syn
Sample_49	MC2_155:2015157	T>G	Coding	2014370:2015404	+	GTG>GGG	V>G	-	nonsyn
Sample_49	MC2_155:2073459	G>A	Coding	2072833:2073759	+	GTG>GTA	V>V	-	syn
Sample_49	MC2_155:2735131	T>G	Coding	2734628:2735338	-	ACC>CCC	T>P	sirR	nonsyn
Sample_49	MC2_155:2763552	G>T	Coding	2762909:2763811	+	GGC>GTC	G>V	dapA	nonsyn
Sample_49	MC2_155:3224977	C>T	Coding	3224830:3225777	+	CTG>TTG	L>L	-	syn
Sample_49	MC2_155:3563368	C>T	Coding	3561206:3564115	+	ATC>ATT	I>I	mmpL5	syn
Sample_49	MC2_155:3635741	A>G	Coding	3635468:3637201	+	AAC>GAC	N>D	-	nonsyn
Sample_49	MC2_155:3887501	C>T	Coding	3886974:3889133	-	GCC>ACC	A>T	uvrB	nonsyn
Sample_49	MC2_155:3898386	A>G	Coding	3897795:3899093	+	ACC>GCC	T>A	-	nonsyn
Sample_49	MC2_155:4030549	T>C	Coding	4030419:4030976	-	CAC>CGC	H>R	-	nonsyn
Sample_49	MC2_155:4284319	A>C	Coding	4284252:4285367	+	GAG>GCG	E>A	-	nonsyn
Sample_49	MC2_155:4388305	T>C	Coding	4388302:4389165	+	TCT>CCT	S>P	panB	nonsyn
Sample_49	MC2_155:4469806	A>G	Coding	4467988:4469913	+	ACC>GCC	T>A	-	nonsyn
Sample_49	MC2_155:4470152	A>C	Coding	4469971:4470984	+	AAC>ACC	N>T	-	nonsyn
Sample_49	MC2_155:4484013	A>C	Coding	4482663:4484033	+	ACC>CCC	T>P	-	nonsyn
Sample_49	MC2_155:4489754	T>C	Coding	4489744:4490139	-	CAG>CGG	Q>R	-	nonsyn
Sample_49	MC2_155:4566819	C>A	Coding	4565698:4566984	-	GAC>TAC	D>Y	dgt	nonsyn
Sample_49	MC2_155:4582097	T>C	Coding	4581902:4582642	-	GAA>GAG	E>E	-	syn
Sample_49	MC2_155:4639070	T>C	Coding	4638328:4639242	+	TTC>TCC	F>S	-	nonsyn
Sample_49	MC2_155:5261796	C>T	Coding	5261524:5262723	+	CCC>CCT	P>P	-	syn
Sample_49	MC2_155:6037373	C>A	Noncoding
Sample_51	MC2_155:872539	G>C	Coding	872516:873385	-	CGC>GGC	R>G	-	nonsyn
Sample_51	MC2_155:1039261	T>C	Coding	1039133:1039378	+	GAT>GAC	D>D	-	syn
Sample_51	MC2_155:3262570	G>A	Coding	3261384:3263135	-	TCC>TTC	S>F	treZ	nonsyn
Sample_51	MC2_155:3915062	C>T	Coding	3914094:3915242	+	CAC>CAT	H>H	-	syn
Sample_51	MC2_155:4582795	G>A	Coding	4582662:4583807	-	TCC>TTC	S>F	dnaJ2	nonsyn
Sample_51	MC2_155:4875088	G>A	Noncoding
Sample_51	MC2_155:5336355	C>A	Coding	5335858:5337264	-	GTG>TTG	V>L	-	nonsyn
Sample_51	MC2_155:5644051	G>C	Coding	5642768:5644729	+	GTG>GTC	V>V	-	syn
Sample_51	MC2_155:6035777	T>G	Coding	6034346:6035881	-	GCA>GCC	A>A	-	syn
Sample_51	MC2_155:6101725	C>T	Coding	6100979:6101818	-	GCC>ACC	A>T	-	nonsyn
Sample_51	MC2_155:6615960	G>A	Coding	6615149:6616051	-	ACC>ATC	T>I	-	nonsyn
Sample_52	MC2_155:44389	T>C	Noncoding
Sample_52	MC2_155:361976	T>C	Coding	360846:362081	-	AAC>GAC	N>D	-	nonsyn
Sample_52	MC2_155:2111200	T>A	Coding	2111154:2112140	+	CTC>CAC	L>H	-	nonsyn
Sample_52	MC2_155:2144872	A>G	Noncoding
Sample_52	MC2_155:2962792	G>A	Coding	2962618:2962995	+	GAC>AAC	D>N	-	nonsyn
Sample_52	MC2_155:3317066	T>G	Coding	3316707:3317759	-	ACC>CCC	T>P	cydB	nonsyn
Sample_52	MC2_155:3829402	A>G	Coding	3829347:3829913	+	GAG>GGG	E>G	-	nonsyn
Sample_52	MC2_155:3940479	A>G	Noncoding
Sample_52	MC2_155:4335584	A>C	Coding	4334947:4336224	-	GTC>GGC	V>G	-	nonsyn
Sample_52	MC2_155:4665012	G>T	Coding	4664938:4665198	+	AAG>AAT	K>N	-	nonsyn
Sample_52	MC2_155:6347906	C>A	Coding	6347799:6348236	-	GGG>TGG	G>W	-	nonsyn
Sample_52	MC2_155:6382203	A>G	Coding	6380960:6382204	-	GTG>GCG	M>A	-	nonsyn
Sample_57	MC2_155:37602	C>A	Coding	20662:43233	+	GCC>GCA	A>A	-	syn
Sample_57	MC2_155:892528	G>A	Coding	892266:893768	+	AGC>AAC	S>N	-	nonsyn
Sample_57	MC2_155:3459939	C>G	Coding	3458438:3459991	-	TGG>TCG	W>S	aldA	nonsyn
Sample_57	MC2_155:3481527	G>A	Coding	3480054:3481571	-	GTC>GTT	V>V	-	syn
Sample_57	MC2_155:3593894	G>A	Coding	3593350:3593955	-	GCC>GTC	A>V	-	nonsyn
Sample_57	MC2_155:5665483	C>A	Coding	5665038:5665973	-	CGC>CTC	R>L	-	nonsyn
Sample_57	MC2_155:5885182	T>G	Coding	5885032:5885418	-	CCA>CCC	P>P	-	syn
Sample_57	MC2_155:6745819	G>T	Coding	6745713:6747098	-	CCG>CAG	P>Q	-	nonsyn
Sample_59	MC2_155:528734	T>G	Coding	528704:529216	-	ACA>ACC	T>T	-	syn
Sample_59	MC2_155:649197	C>T	Coding	648856:649377	-	GCA>ACA	A>T	-	nonsyn
Sample_59	MC2_155:947543	C>G	Coding	947386:948309	-	GGT>GCT	G>A	-	nonsyn
Sample_59	MC2_155:1421849	C>T	Noncoding
Sample_59	MC2_155:1806640	A>C	Coding	1806135:1807205	-	CTG>CGG	L>R	-	nonsyn
Sample_59	MC2_155:2618386	C>G	Coding	2617784:2618737	-	GTG>CTG	V>L	-	nonsyn
Sample_59	MC2_155:3566192	A>C	Coding	3566066:3566812	+	ACC>CCC	T>P	-	nonsyn
Sample_59	MC2_155:4351676	C>G	Coding	4351314:4352207	-	GCC>CCC	A>P	mmpS3	nonsyn
Sample_59	MC2_155:4736700	C>T	Coding	4735743:4736717	-	GAG>GAA	E>E	-	syn
Sample_59	MC2_155:5515096	C>T	Coding	5514738:5515610	+	GCG>GTG	A>V	-	nonsyn
Sample_59	MC2_155:5540179	G>A	Coding	5539807:5540778	+	GCG>ACG	A>T	-	nonsyn
Sample_59	MC2_155:5834355	G>A	Coding	5834308:5835576	+	TCG>TCA	S>S	-	syn
Sample_59	MC2_155:6337704	G>T	Coding	6336297:6338105	+	GTG>TTG	V>L	leuA	nonsyn
Sample_59	MC2_155:6748354	T>C	Coding	6747338:6748540	-	AGC>GGC	S>G	-	nonsyn
Sample_61	MC2_155:62303	G>A	Coding	62089:62913	-	GCC>GTC	A>V	-	nonsyn
Sample_61	MC2_155:538657	T>G	Coding	537965:538813	-	ACC>CCC	T>P	-	nonsyn
Sample_61	MC2_155:800109	C>T	Coding	798379:800247	+	AGC>AGT	S>S	dnaK	syn
Sample_61	MC2_155:1149309	A>G	Noncoding
Sample_61	MC2_155:1562216	G>T	Coding	1561120:1562724	+	GGG>GTG	G>V	-	nonsyn
Sample_61	MC2_155:2170842	G>T	Noncoding
Sample_61	MC2_155:2471638	C>T	Coding	2470807:2472261	+	CGG>TGG	R>W	leuC	nonsyn
Sample_61	MC2_155:3005360	G>A	Coding	3005292:3005723	-	CTC>TTC	L>F	-	nonsyn
Sample_61	MC2_155:3221216	C>T	Noncoding
Sample_61	MC2_155:3259887	C>T	Noncoding
Sample_61	MC2_155:3269048	G>A	Coding	3267572:3269731	-	TTC>TTT	F>F	-	syn
Sample_61	MC2_155:4442708	A>C	Coding	4442422:4442952	-	GTC>GGC	V>G	-	nonsyn
Sample_61	MC2_155:5652339	G>A	Coding	5652025:5652462	-	CAC>TAC	H>Y	-	nonsyn
Sample_61	MC2_155:5854602	G>A	Coding	5854115:5855041	-	GCG>GTG	A>V	-	nonsyn
Sample_61	MC2_155:6147659	A>C	Coding	6147437:6148057	-	CGT>CGG	R>R	cynT	syn
Sample_61	MC2_155:6183388	A>C	Coding	6182914:6183636	-	GTT>GTG	V>V	-	syn
Sample_61	MC2_155:6727189	G>A	Coding	6726772:6727791	+	GTG>ATG	V>M	-	nonsyn
Sample_64	MC2_155:47815	G>A	Coding	47464:47871	-	GCC>GCT	A>A	-	syn
Sample_64	MC2_155:347983	T>G	Coding	346167:347996	-	CAC>CCC	H>P	-	nonsyn
Sample_64	MC2_155:1647785	C>T	Noncoding
Sample_64	MC2_155:1953218	C>T	Coding	1952805:1954466	+	CGC>CGT	R>R	mtrB	syn
Sample_64	MC2_155:2564548	G>T	Noncoding
Sample_64	MC2_155:3747000	T>C	Noncoding
Sample_64	MC2_155:4940503	G>T	Coding	4939297:4940553	+	GAC>TAC	D>Y	-	nonsyn
Sample_64	MC2_155:5125478	G>C	Coding	5125065:5125901	-	CTC>GTC	L>V	-	nonsyn
Sample_64	MC2_155:5412730	C>A	Coding	5411361:5412791	-	CGG>CTG	R>L	-	nonsyn
Sample_64	MC2_155:5462852	C>A	Coding	5460900:5463548	+	GGC>GGA	G>G	-	syn
Sample_64	MC2_155:5583384	C>A	Coding	5583124:5585898	+	GAC>GAA	D>E	-	nonsyn
Sample_64	MC2_155:6102277	T>C	Coding	6101981:6103438	-	ACC>GCC	T>A	-	nonsyn
Sample_64	MC2_155:6509154	T>C	Coding	6508934:6509587	+	ATC>ACC	I>T	ethR	nonsyn
Sample_64	MC2_155:6680899	A>C	Noncoding
Sample_64	MC2_155:6751709	T>C	Coding	6751669:6752406	-	CAG>CGG	Q>R	-	nonsyn
Sample_65	MC2_155:233746	A>G	Noncoding
Sample_65	MC2_155:1040520	A>G	Noncoding
Sample_65	MC2_155:1235991	A>G	Noncoding
Sample_65	MC2_155:1343559	C>T	Coding	1339458:1344461	+	CGA>TGA	R>*	-	nonsyn
Sample_65	MC2_155:1424605	A>G	Coding	1423699:1426950	-	GGT>GGC	G>G	recB	syn
Sample_65	MC2_155:1514077	C>G	Coding	1513856:1514707	+	GTC>GTG	V>V	-	syn
Sample_65	MC2_155:1834222	A>G	Coding	1834049:1834819	+	TTA>TTG	L>L	-	syn
Sample_65	MC2_155:1890547	G>A	Coding	1890109:1891737	-	AAC>AAT	N>N	accD5	syn
Sample_65	MC2_155:2134740	C>T	Coding	2134730:2135488	-	GGG>GAG	G>E	nuoJ	nonsyn
Sample_65	MC2_155:3433375	C>T	Coding	3433051:3433617	+	CGG>TGG	R>W	-	nonsyn
Sample_65	MC2_155:3800252	G>A	Noncoding
Sample_65	MC2_155:4075608	G>C	Coding	4075204:4076730	+	ACG>ACC	T>T	-	syn
Sample_65	MC2_155:4255331	G>A	Coding	4254810:4255607	-	CGG>TGG	R>W	-	nonsyn
Sample_65	MC2_155:4513160	C>T	Coding	4512509:4514788	-	AGG>AGA	R>R	-	syn
Sample_65	MC2_155:4690988	T>C	Coding	4690770:4691408	+	TGT>TGC	C>C	-	syn
Sample_65	MC2_155:4827537	A>C	Coding	4827209:4828651	+	AAG>ACG	K>T	-	nonsyn
Sample_65	MC2_155:4848079	G>T	Coding	4847676:4848146	+	GGC>GTC	G>V	-	nonsyn
Sample_65	MC2_155:6075600	G>A	Coding	6075095:6075712	-	GCC>GTC	A>V	-	nonsyn
Sample_65	MC2_155:6221042	G>T	Coding	6220894:6221217	+	TGG>TTG	W>L	-	nonsyn
Sample_65	MC2_155:6409000	T>C	Coding	6408858:6409355	-	GAC>GGC	D>G	-	nonsyn
Sample_65	MC2_155:6558092	T>C	Coding	6557726:6559033	+	TCC>CCC	S>P	-	nonsyn
Sample_65	MC2_155:6756887	G>T	Coding	6756481:6757227	+	CGA>CTA	R>L	-	nonsyn
Sample_66	MC2_155:682415	A>C	Coding	680991:683195	-	TGC>GGC	C>G	fadE6	nonsyn
Sample_66	MC2_155:941268	A>G	Coding	940945:941373	-	TGG>CGG	W>R	-	nonsyn
Sample_66	MC2_155:976713	C>T	Coding	975611:977140	+	TCG>TTG	S>L	gabD2	nonsyn
Sample_66	MC2_155:1311013	A>G	Coding	1309929:1311629	+	GAC>GGC	D>G	-	nonsyn
Sample_66	MC2_155:1839799	A>C	Coding	1839657:1840271	-	ATC>AGC	I>S	-	nonsyn
Sample_66	MC2_155:1869492	C>A	Coding	1869033:1869920	-	GAG>GAT	E>D	-	nonsyn
Sample_66	MC2_155:2141571	C>A	Coding	2141044:2141802	-	GGT>TGT	G>C	nuoE	nonsyn
Sample_66	MC2_155:2735971	G>C	Coding	2735420:2736397	+	GCG>GCC	A>A	ribF	syn
Sample_66	MC2_155:3180804	A>G	Coding	3179141:3181231	-	GTC>GCC	V>A	tkt	nonsyn
Sample_66	MC2_155:3437872	A>C	Noncoding
Sample_66	MC2_155:3680067	G>A	Coding	3679812:3680303	+	GAC>AAC	D>N	-	nonsyn
Sample_66	MC2_155:4082173	C>A	Coding	4081515:4082864	-	CGG>CTG	R>L	-	nonsyn
Sample_66	MC2_155:4483731	G>T	Coding	4482663:4484033	+	GCC>TCC	A>S	-	nonsyn
Sample_66	MC2_155:5455955	G>A	Coding	5454529:5455962	-	TCG>TTG	S>L	-	nonsyn
Sample_66	MC2_155:6174533	G>A	Coding	6174497:6175072	-	TTC>TTT	F>F	hpt	syn
Sample_66	MC2_155:6196539	G>A	Coding	6195934:6197205	-	CCC>TCC	P>S	-	nonsyn
Sample_66	MC2_155:6302537	A>C	Coding	6302216:6303232	+	ACC>CCC	T>P	-	nonsyn
Sample_68	MC2_155:129674	C>T	Noncoding
Sample_68	MC2_155:709158	G>T	Coding	708046:709245	-	CGC>AGC	R>S	-	nonsyn
Sample_68	MC2_155:808415	C>T	Coding	808209:809111	-	GTG>ATG	V>M	-	nonsyn
Sample_68	MC2_155:1004738	C>T	Noncoding
Sample_68	MC2_155:1243158	C>A	Coding	1242949:1244163	+	GGC>GGA	G>G	-	syn
Sample_68	MC2_155:1466567	C>T	Coding	1463262:1466753	+	ATC>ATT	I>I	-	syn
Sample_68	MC2_155:2284029	C>T	Coding	2283562:2284926	+	TTC>TTT	F>F	-	syn
Sample_68	MC2_155:2434084	A>G	Noncoding
Sample_68	MC2_155:2581263	G>A	Coding	2580189:2581388	-	CCC>CCT	P>P	-	syn
Sample_68	MC2_155:2746508	C>G	Coding	2745326:2747068	-	CTG>CTC	L>L	-	syn
Sample_68	MC2_155:2746676	A>G	Coding	2745326:2747068	-	GGT>GGC	G>G	-	syn
Sample_68	MC2_155:2746748	C>G	Coding	2745326:2747068	-	GGG>GGC	G>G	-	syn
Sample_68	MC2_155:2746760	A>G	Coding	2745326:2747068	-	GCT>GCC	A>A	-	syn
Sample_68	MC2_155:3460106	C>A	Coding	3460001:3461119	-	GAG>GAT	E>D	adhD	nonsyn
Sample_68	MC2_155:3633782	A>C	Noncoding
Sample_68	MC2_155:4105340	A>C	Coding	4104989:4105933	-	CGT>CGG	R>R	-	syn
Sample_68	MC2_155:5699119	G>A	Coding	5698885:5699343	+	GCC>ACC	A>T	-	nonsyn
Sample_68	MC2_155:5895063	C>T	Coding	5894734:5896524	+	GGC>GGT	G>G	-	syn
Sample_68	MC2_155:5926404	A>G	Coding	5925867:5926631	-	GAT>GAC	D>D	-	syn
Sample_68	MC2_155:5964849	G>A	Coding	5964232:5964996	-	CCA>TCA	P>S	-	nonsyn
Sample_68	MC2_155:6404256	C>A	Coding	6404041:6404796	+	GGC>GGA	G>G	-	syn
Sample_68	MC2_155:6444997	T>C	Coding	6443635:6445515	+	TAC>CAC	Y>H	aftA	nonsyn
Sample_68	MC2_155:6817460	G>A	Coding	6812624:6818302	-	ATC>ATT	I>I	-	syn
Sample_69	MC2_155:134486	C>G	Coding	134321:135763	-	GTG>GTC	V>V	-	syn
Sample_69	MC2_155:134507	T>G	Coding	134321:135763	-	GCA>GCC	A>A	-	syn
Sample_69	MC2_155:134537	C>G	Coding	134321:135763	-	GCG>GCC	A>A	-	syn
Sample_69	MC2_155:134579	G>T	Coding	134321:135763	-	GAC>GAA	D>E	-	nonsyn
Sample_69	MC2_155:134580	T>G	Coding	134321:135763	-	GAC>GCC	D>A	-	nonsyn
Sample_69	MC2_155:134581	C>A	Coding	134321:135763	-	GAC>TAC	D>Y	-	nonsyn
Sample_69	MC2_155:134582	T>G	Coding	134321:135763	-	ACA>ACC	T>T	-	syn
Sample_69	MC2_155:134915	G>T	Coding	134321:135763	-	ATC>ATA	I>I	-	syn
Sample_69	MC2_155:135688	A>G	Coding	134321:135763	-	TTG>CTG	L>L	-	syn
Sample_69	MC2_155:135692	T>G	Coding	134321:135763	-	GCA>GCC	A>A	-	syn
Sample_69	MC2_155:135695	C>A	Coding	134321:135763	-	CTG>CTT	L>L	-	syn
Sample_69	MC2_155:212218	G>A	Coding	210191:213034	-	CAC>TAC	H>Y	mmpL6	nonsyn
Sample_69	MC2_155:231931	G>A	Noncoding
Sample_69	MC2_155:610108	C>T	Coding	609107:612553	-	GCC>ACC	A>T	pknK	nonsyn
Sample_69	MC2_155:962536	A>G	Coding	962211:962933	+	GAG>GGG	E>G	-	nonsyn
Sample_69	MC2_155:1199448	T>G	Noncoding
Sample_69	MC2_155:1360683	C>A	Coding	1360182:1361180	-	GAG>GAT	E>D	-	nonsyn
Sample_69	MC2_155:1500825	A>G	Noncoding
Sample_69	MC2_155:1809868	C>T	Noncoding
Sample_69	MC2_155:4278532	C>T	Noncoding
Sample_69	MC2_155:4944831	T>C	Noncoding
Sample_69	MC2_155:5076560	G>A	Coding	5075958:5076893	-	CGC>TGC	R>C	-	nonsyn
Sample_69	MC2_155:5321049	G>A	Coding	5320311:5321324	-	GGC>GGT	G>G	ispH1	syn
Sample_69	MC2_155:5955183	T>C	Coding	5955074:5955775	-	GAC>GGC	D>G	-	nonsyn
Sample_69	MC2_155:6840256	T>G	Coding	6839637:6840557	+	CTG>CGG	L>R	-	nonsyn
Sample_69	MC2_155:6873333	T>C	Coding	6873137:6874246	-	GAC>GGC	D>G	-	nonsyn
Sample_70	MC2_155:172670	C>T	Noncoding
Sample_70	MC2_155:248581	A>G	Coding	247967:248809	+	GGA>GGG	G>G	-	syn
Sample_70	MC2_155:714888	G>A	Coding	713662:715059	-	CGG>TGG	R>W	-	nonsyn
Sample_70	MC2_155:2204947	T>C	Coding	2204387:2205121	+	TGT>TGC	C>C	-	syn
Sample_70	MC2_155:2850167	C>A	Coding	2849477:2850838	+	CGC>AGC	R>S	hemY	nonsyn
Sample_70	MC2_155:3122642	C>A	Coding	3121278:3124625	+	TCC>TCA	S>S	carB	syn
Sample_70	MC2_155:3392243	G>A	Coding	3391630:3392466	+	GGC>GAC	G>D	-	nonsyn
Sample_70	MC2_155:3400714	A>G	Coding	3400216:3400797	+	ACG>GCG	T>A	-	nonsyn
Sample_70	MC2_155:3482471	A>G	Coding	3482190:3483368	-	TGG>CGG	W>R	-	nonsyn
Sample_70	MC2_155:3608891	G>C	Coding	3608663:3609562	+	GTG>CTG	V>L	-	nonsyn
Sample_70	MC2_155:4037772	C>T	Coding	4037161:4037853	-	GAG>AAG	E>K	-	nonsyn
Sample_70	MC2_155:4440164	A>C	Coding	4439416:4440576	-	GTC>GGC	V>G	-	nonsyn
Sample_70	MC2_155:5287532	A>G	Coding	5287479:5287940	-	TGG>CGG	W>R	-	nonsyn
Sample_70	MC2_155:5614484	C>T	Coding	5613628:5615481	+	GCG>GTG	A>V	-	nonsyn
Sample_70	MC2_155:6292083	T>C	Coding	6291800:6292324	+	CTG>CCG	L>P	-	nonsyn
Sample_70	MC2_155:6333773	A>G	Coding	6333665:6334375	+	ATC>GTC	I>V	-	nonsyn
Sample_70	MC2_155:6630930	C>A	Coding	6630535:6631020	+	GGC>GGA	G>G	-	syn
Sample_70	MC2_155:6697023	G>C	Coding	6696049:6697467	-	CGC>GGC	R>G	-	nonsyn
Sample_70	MC2_155:6876246	T>C	Noncoding
Sample_70	MC2_155:6904599	G>A	Coding	6904458:6905726	-	ACC>ACT	T>T	-	syn
Sample_70	MC2_155:6953436	A>G	Coding	6953000:6953914	+	GAA>GGA	E>G	-	nonsyn
Sample_73	MC2_155:285935	G>A	Coding	285829:286608	-	ACC>ATC	T>I	trmB	nonsyn
Sample_73	MC2_155:933368	T>A	Coding	932346:935225	-	AAC>TAC	N>Y	-	nonsyn
Sample_73	MC2_155:1236571	C>T	Noncoding
Sample_73	MC2_155:2025636	G>A	Coding	2025314:2026027	-	GCC>GTC	A>V	-	nonsyn
Sample_73	MC2_155:2030617	G>T	Coding	2030024:2030686	+	GCG>GCT	A>A	-	syn
Sample_73	MC2_155:2219076	A>G	Coding	2219053:2222697	+	GAA>GAG	E>E	-	syn
Sample_73	MC2_155:2454390	A>G	Coding	2454233:2455075	+	GAC>GGC	D>G	-	nonsyn
Sample_73	MC2_155:2672493	A>G	Coding	2671365:2672855	+	ACA>GCA	T>A	cobQ	nonsyn
Sample_73	MC2_155:3178416	T>G	Coding	3177991:3179106	-	AAG>CAG	K>Q	tal	nonsyn
Sample_73	MC2_155:3692088	T>C	Coding	3692009:3692782	-	CAG>CGG	Q>R	-	nonsyn
Sample_73	MC2_155:3863234	G>A	Coding	3863096:3863290	-	ACC>ACT	T>T	rpmI	syn
Sample_73	MC2_155:4908030	G>A	Noncoding
Sample_73	MC2_155:5362472	A>C	Noncoding
Sample_73	MC2_155:6628961	G>T	Coding	6628605:6630302	-	CGC>AGC	R>S	-	nonsyn
Sample_73	MC2_155:6728163	A>C	Coding	6727850:6729319	+	GAG>GCG	E>A	-	nonsyn
Sample_73	MC2_155:6953328	A>G	Coding	6953000:6953914	+	AAA>AGA	K>R	-	nonsyn
Sample_74	MC2_155:1702924	C>A	Coding	1702475:1703275	+	GCC>GCA	A>A	-	syn
Sample_74	MC2_155:2064655	C>A	Coding	2063501:2064676	-	GCC>TCC	A>S	-	nonsyn
Sample_74	MC2_155:2266993	C>T	Coding	2265534:2267603	+	GCG>GTG	A>V	-	nonsyn
Sample_74	MC2_155:2834341	C>T	Coding	2834189:2834887	-	GCG>ACG	A>T	-	nonsyn
Sample_74	MC2_155:3859337	A>C	Coding	3858229:3859830	+	GAC>GCC	D>A	-	nonsyn
Sample_74	MC2_155:4416013	C>T	Coding	4414930:4416180	+	CTC>TTC	L>F	kasA	nonsyn
Sample_74	MC2_155:4954743	G>A	Coding	4953623:4954855	-	GCC>GTC	A>V	-	nonsyn
Sample_74	MC2_155:5591163	C>T	Coding	5591027:5591611	+	GCC>GTC	A>V	-	nonsyn
Sample_74	MC2_155:6558570	G>A	Coding	6557726:6559033	+	TGC>TAC	C>Y	-	nonsyn
Sample_74	MC2_155:6712931	A>C	Coding	6712319:6713827	-	GGT>GGG	G>G	-	syn
Sample_75	MC2_155:226706	C>A	Noncoding
Sample_75	MC2_155:595786	C>A	Coding	595700:597013	+	CTC>CTA	L>L	-	syn
Sample_75	MC2_155:2062881	C>T	Coding	2061478:2063127	+	GCC>GCT	A>A	-	syn
Sample_75	MC2_155:2473552	G>C	Coding	2473082:2473708	+	GCG>GCC	A>A	hup	syn
Sample_75	MC2_155:2925988	C>A	Coding	2924766:2926253	+	CCC>CAC	P>H	mce3F	nonsyn
Sample_75	MC2_155:3377334	G>A	Coding	3377072:3377641	+	CGC>CAC	R>H	rpoE	nonsyn
Sample_75	MC2_155:3410116	G>T	Noncoding
Sample_75	MC2_155:3846921	G>A	Coding	3846801:3849299	-	CTC>CTT	L>L	pheT	syn
Sample_75	MC2_155:3869579	T>G	Coding	3869365:3870501	-	GAG>GCG	E>A	-	nonsyn
Sample_75	MC2_155:4031363	G>A	Coding	4031150:4032022	+	GAA>AAA	E>K	-	nonsyn
Sample_75	MC2_155:4138599	T>C	Coding	4138345:4139289	-	ATC>GTC	I>V	-	nonsyn
Sample_75	MC2_155:4138654	G>A	Coding	4138345:4139289	-	GGC>GGT	G>G	-	syn
Sample_75	MC2_155:4148067	T>G	Noncoding
Sample_75	MC2_155:4160699	G>C	Coding	4160018:4161433	-	TTC>TTG	F>L	-	nonsyn
Sample_75	MC2_155:4849197	C>A	Coding	4848150:4849370	-	CCG>CCT	P>P	-	syn
Sample_75	MC2_155:5609787	A>C	Coding	5609108:5610238	-	CTG>CGG	L>R	-	nonsyn
Sample_75	MC2_155:5966025	G>A	Coding	5965266:5966216	-	CTC>CTT	L>L	-	syn
Sample_75	MC2_155:6072097	T>A	Coding	6071499:6072137	+	CTC>CAC	L>H	-	nonsyn
Sample_75	MC2_155:6091667	G>A	Noncoding
Sample_75	MC2_155:6295239	A>C	Coding	6293852:6295417	-	GTC>GGC	V>G	glpK	nonsyn
Sample_75	MC2_155:6349695	A>G	Coding	6348326:6349726	+	GAC>GGC	D>G	-	nonsyn
Sample_75	MC2_155:6390840	A>G	Coding	6388907:6391126	-	GTG>GCG	V>A	-	nonsyn
Sample_75	MC2_155:6517892	C>T	Coding	6516665:6518305	+	CGC>TGC	R>C	-	nonsyn
Sample_75	MC2_155:6669535	G>A	Coding	6669181:6669858	-	CCC>CCT	P>P	-	syn
Sample_75	MC2_155:6955415	G>A	Coding	6954819:6955484	+	GAG>GAA	E>E	-	syn
Sample_77	MC2_155:366066	C>A	Coding	364944:366446	+	CTG>ATG	L>M	-	nonsyn
Sample_77	MC2_155:1039075	A>C	Noncoding
Sample_77	MC2_155:1068824	G>T	Coding	1068608:1069261	+	GAC>TAC	D>Y	-	nonsyn
Sample_77	MC2_155:1517666	G>T	Coding	1517221:1518513	-	GCC>GAC	A>D	-	nonsyn
Sample_77	MC2_155:1800091	C>A	Coding	1799491:1800588	+	CTC>ATC	L>I	-	nonsyn
Sample_77	MC2_155:2152094	A>G	Coding	2151207:2152409	-	TGG>CGG	W>R	-	nonsyn
Sample_77	MC2_155:2303531	A>C	Noncoding
Sample_77	MC2_155:2670579	G>A	Coding	2670511:2671368	+	CCG>CCA	P>P	map	syn
Sample_77	MC2_155:3713245	A>C	Coding	3712636:3713250	-	GGT>GGG	G>G	-	syn
Sample_77	MC2_155:3899852	A>C	Coding	3899090:3900469	+	AAA>CAA	K>Q	-	nonsyn
Sample_77	MC2_155:4202820	G>A	Noncoding
Sample_77	MC2_155:4576397	C>T	Coding	4575801:4576700	-	GGC>AGC	G>S	era	nonsyn
Sample_77	MC2_155:4820976	A>C	Coding	4820753:4827151	+	GAC>GCC	D>A	-	nonsyn
Sample_77	MC2_155:5399729	T>C	Coding	5399548:5400261	+	GTC>GCC	V>A	-	nonsyn
Sample_77	MC2_155:5924537	T>C	Coding	5923342:5924568	-	GAC>GGC	D>G	-	nonsyn
Sample_77	MC2_155:5950417	C>A	Noncoding
Sample_77	MC2_155:6242920	G>A	Noncoding
Sample_77	MC2_155:6278883	A>C	Noncoding
Sample_77	MC2_155:6535137	C>A	Coding	6535075:6535959	-	GGC>TGC	G>C	-	nonsyn
Sample_78	MC2_155:17986	C>T	Coding	17135:18862	+	ATC>ATT	I>I	-	syn
Sample_78	MC2_155:1666994	G>T	Coding	1665863:1667266	+	GCC>TCC	A>S	gadB	nonsyn
Sample_78	MC2_155:1814356	T>G	Coding	1814226:1814570	+	GTG>GGG	V>G	-	nonsyn
Sample_78	MC2_155:1890082	T>G	Coding	1889801:1890085	-	AGC>CGC	S>R	-	nonsyn
Sample_78	MC2_155:2060671	G>A	Coding	2060425:2061450	+	GGC>AGC	G>S	-	nonsyn
Sample_78	MC2_155:2309068	C>A	Coding	2308638:2309459	+	CCG>CAG	P>Q	-	nonsyn
Sample_78	MC2_155:2855998	G>T	Coding	2855326:2856108	-	GAC>GAA	D>E	-	nonsyn
Sample_78	MC2_155:2903493	A>G	Coding	2903018:2903716	-	CTC>CCC	L>P	-	nonsyn
Sample_78	MC2_155:2954808	G>T	Coding	2954758:2955642	-	CCC>ACC	P>T	-	nonsyn
Sample_78	MC2_155:3382743	T>G	Coding	3382707:3383591	+	TCA>GCA	S>A	-	nonsyn
Sample_78	MC2_155:3459073	T>G	Coding	3458438:3459991	-	ATC>CTC	I>L	aldA	nonsyn
Sample_78	MC2_155:3628504	G>A	Noncoding
Sample_78	MC2_155:4048272	G>T	Coding	4047609:4048463	+	GGC>TGC	G>C	-	nonsyn
Sample_78	MC2_155:4498304	T>C	Coding	4498113:4498631	-	ACT>GCT	T>A	-	nonsyn
Sample_78	MC2_155:4815289	G>T	Coding	4814914:4816251	-	GAC>GAA	D>E	-	nonsyn
Sample_78	MC2_155:5386095	G>A	Coding	5386058:5386390	-	TCA>TTA	S>L	-	nonsyn
Sample_78	MC2_155:5433091	G>A	Coding	5433021:5434616	+	AGC>AAC	S>N	fadD14	nonsyn
Sample_78	MC2_155:5674762	A>G	Coding	5672893:5674788	-	TGT>TGC	C>C	-	syn
Sample_78	MC2_155:6006043	C>T	Coding	6004143:6006764	-	CGT>CAT	R>H	-	nonsyn
Sample_78	MC2_155:6031952	A>T	Coding	6031474:6032238	-	CTG>CAG	L>Q	-	nonsyn
Sample_78	MC2_155:6455680	A>C	Coding	6455529:6456767	+	GAC>GCC	D>A	-	nonsyn
*Noncoding - noncoding sequence, Coding - coding sequence. ** Gene is the gene name or type of gene where the base substitution occurs.*** syn - synonymous, nonsyn - nonsynonymous.
