# Supplementary material for: The Rate and Spectrum of Spontaneous Mutations in Mycobacterium smegmatis, a Bacterium Naturally Devoid of the Postreplicative Mismatch Repair Pathway
Source: G3 (Bethesda). 2016 May 17;6(7):2157–63. doi: 10.1534/g3.116.030130 (PMC4938668; doi:10.1534/g3.116.030130)
Supplement: Supplemental Material [file supp_g3.116.030130_TableS3.xlsx]

## Sheet: S3
Suppl. Table 3. Indel details
Samples	Chromosome	Position	Reference	Indels	SSR* motif
Sample_1	MC2_155	656084	C	-1t	-
Sample_1	MC2_155	2773496	C	+1g	3g
Sample_1	MC2_155	3277769	C	-1g	5g
Sample_5	MC2_155	3615567	A	+1g	5g
Sample_5	MC2_155	3996806	T	+1c	4c
Sample_5	MC2_155	6384380	G	+1c	6c
Sample_6	MC2_155	2710155	T	+3ggc	3ggc
Sample_6	MC2_155	3143649	T	-13ggacacgagcaaa	-
Sample_6	MC2_155	4488737	C	+1g	5g
Sample_6	MC2_155	4714216	T	-12ttcggcctcggc	3t
Sample_8	MC2_155	392572	G	+1c	6c
Sample_8	MC2_155	815899	T	+1g	6g
Sample_8	MC2_155	4599614	A	-1c	6c
Sample_8	MC2_155	6500085	T	+1c	6c
Sample_8	MC2_155	6581663	T	+1c	-
Sample_8	MC2_155	6943943	C	-1a	8a
Sample_9	MC2_155	1871465	G	-1c	4c
Sample_9	MC2_155	4168750	C	-1g	7g
Sample_10	MC2_155	896247	C	-3tcg	4tcg
Sample_10	MC2_155	1374242	C	+1g	5g
Sample_10	MC2_155	3767593	G	+1c	4c
Sample_10	MC2_155	4749760	A	-1c	-
Sample_12	MC2_155	1014067	G	+1c	6c
Sample_12	MC2_155	1269625	A	-1g	4g
Sample_12	MC2_155	1344684	T	+1c	6c
Sample_12	MC2_155	1408027	C	+1g	6g
Sample_12	MC2_155	2872536	C	+1g	5g
Sample_12	MC2_155	4441053	G	+1c	5c
Sample_12	MC2_155	5769206	G	-3cgt	-
Sample_12	MC2_155	6061364	A	+3ctt	3ctt
Sample_13	MC2_155	1532468	C	-1g	4g
Sample_13	MC2_155	6539195	C	+1g	4g
Sample_13	MC2_155	6796328	G	+1a	-
Sample_14	MC2_155	383559	T	+1c	6c
Sample_14	MC2_155	421341	C	+6tcgacg	-
Sample_14	MC2_155	1532468	C	-1g	4g
Sample_14	MC2_155	4099574	G	+1c	7c
Sample_14	MC2_155	4210628	C	-1t	3t
Sample_14	MC2_155	6242758	A	+1g	7g
Sample_14	MC2_155	6741553	T	+1g	3g
Sample_15	MC2_155	6626245	C	+1g	-
Sample_17	MC2_155	1148347	A	+1g	6g
Sample_17	MC2_155	1651761	A	+1g	7g
Sample_17	MC2_155	1806909	T	+1g	-
Sample_17	MC2_155	3637007	A	-1g	-
Sample_19	MC2_155	897894	T	+1g	5g
Sample_19	MC2_155	2052682	G	-1c	-
Sample_19	MC2_155	4273837	C	+1g	3g
Sample_19	MC2_155	4711670	T	-9tcgtcggag	3tcgtcggag
Sample_19	MC2_155	5335782	G	+1c	6c
Sample_20	MC2_155	1626279	A	+1c	6c
Sample_20	MC2_155	4377990	C	+1a	4a
Sample_20	MC2_155	4822365	A	+2gg	3g
Sample_23	MC2_155	1017927	C	+1g	-
Sample_23	MC2_155	4762609	T	+1g	7g
Sample_25	MC2_155	3232205	A	-1c	4c
Sample_25	MC2_155	3626327	G	-1a	-
Sample_25	MC2_155	4207779	C	+1g	6g
Sample_25	MC2_155	5789621	G	-1t	5t
Sample_26	MC2_155	4168750	C	-1g	7g
Sample_26	MC2_155	4333389	T	+1g	3g
Sample_28	MC2_155	1950115	C	+1a	-
Sample_28	MC2_155	5386539	A	-12gccccaaccagg	-
Sample_28	MC2_155	5517039	T	+9ttcgcaccg	3t
Sample_28	MC2_155	6821490	T	+1g	6g
Sample_29	MC2_155	4036374	T	+1c	6c
Sample_29	MC2_155	4072944	G	-1a	3a
Sample_30	MC2_155	183039	C	-1a	-
Sample_30	MC2_155	1563413	A	+1g	4g
Sample_30	MC2_155	1824085	A	+1c	-
Sample_30	MC2_155	2271820	G	+1c	6c
Sample_30	MC2_155	3707710	A	+6gcgtcg	-
Sample_30	MC2_155	4128640	C	+1g	6g
Sample_33	MC2_155	208228	A	+1g	5g
Sample_33	MC2_155	6613740	C	+1g	5g
Sample_34	MC2_155	419372	A	-1c	6c
Sample_34	MC2_155	711966	A	+1g	6g
Sample_34	MC2_155	896247	C	-3tcg	4tcg
Sample_34	MC2_155	3783406	G	-1a	5a
Sample_34	MC2_155	5194086	C	-1t	-
Sample_34	MC2_155	5303401	A	-1c	6c
Sample_34	MC2_155	5517060	C	-16gcaccgcgcacctttt	-
Sample_36	MC2_155	681693	G	-1c	5c
Sample_36	MC2_155	3250127	A	+1c	5c
Sample_37	MC2_155	1270701	G	-1c	5c
Sample_37	MC2_155	1300055	C	-1a	3a
Sample_37	MC2_155	3894437	G	+1c	6c
Sample_37	MC2_155	4900124	T	-1c	5c
Sample_37	MC2_155	6051556	A	+1t	7t
Sample_37	MC2_155	6169930	T	+6gccgaa	-
Sample_37	MC2_155	6810602	T	+1c	5c
Sample_39	MC2_155	783442	T	+1g	5g
Sample_39	MC2_155	2973585	G	-1c	3c
Sample_39	MC2_155	4042928	T	-6ctcgac	-
Sample_39	MC2_155	4507996	C	+1g	-
Sample_41	MC2_155	252673	A	-9tcatggtct	-
Sample_41	MC2_155	1659020	C	+1g	6g
Sample_41	MC2_155	4038325	G	-1c	3c
Sample_41	MC2_155	5149787	G	-6gcgcct	-
Sample_42	MC2_155	5025777	G	+1c	6c
Sample_42	MC2_155	5038470	C	+1g	3g
Sample_42	MC2_155	6237096	C	+1g	4g
Sample_43	MC2_155	1728985	C	+1g	6g
Sample_43	MC2_155	5630846	C	+1g	4g
Sample_43	MC2_155	5783449	G	-1c	3c
Sample_43	MC2_155	5882705	C	-2cg	5cg
Sample_44	MC2_155	569996	C	+1g	5g
Sample_44	MC2_155	717719	T	+1g	5g
Sample_44	MC2_155	764681	T	+1g	5g
Sample_44	MC2_155	3340749	G	+1c	5c
Sample_44	MC2_155	3606852	C	+1g	5g
Sample_44	MC2_155	6552519	T	+3cgg	4cgg
Sample_44	MC2_155	6987368	G	+9tcgccgtca	-
Sample_45	MC2_155	16828	A	+1g	5g
Sample_45	MC2_155	67799	G	+1c	6c
Sample_45	MC2_155	133429	G	+2gc	5gc
Sample_45	MC2_155	1843442	T	+1g	6g
Sample_45	MC2_155	2904169	T	+1g	5g
Sample_45	MC2_155	3924580	G	+1c	6c
Sample_45	MC2_155	5335782	G	+1c	6c
Sample_46	MC2_155	817402	C	-1g	3g
Sample_46	MC2_155	2733384	G	+1c	6c
Sample_46	MC2_155	3702550	T	+1a	-
Sample_46	MC2_155	6512383	G	+1c	5c
Sample_47	MC2_155	3239448	C	+2ga	-
Sample_47	MC2_155	3554397	A	-1g	3g
Sample_47	MC2_155	3730030	C	+1a	6a
Sample_47	MC2_155	3830350	T	+1c	5c
Sample_47	MC2_155	4730262	G	-1t	7t
Sample_48	MC2_155	4649383	A	+1c	6c
Sample_48	MC2_155	4872624	G	+1c	5c
Sample_48	MC2_155	6163405	C	+1g	6g
Sample_49	MC2_155	203608	A	+1g	4g
Sample_49	MC2_155	310422	C	+1g	6g
Sample_49	MC2_155	1770696	G	+1c	5c
Sample_49	MC2_155	3362609	A	+1g	5g
Sample_49	MC2_155	3633725	A	+1c	6c
Sample_49	MC2_155	4150094	T	+1c	6c
Sample_49	MC2_155	4336153	G	+1c	6c
Sample_49	MC2_155	4775193	T	+2gg	5g
Sample_49	MC2_155	5637587	T	+1c	6c
Sample_49	MC2_155	5737821	C	+2gg	6g
Sample_49	MC2_155	6011769	G	+3gtc	4gtc
Sample_49	MC2_155	6594563	G	+1c	6c
Sample_49	MC2_155	6675097	G	-1c	5c
Sample_51	MC2_155	585117	G	+1c	5c
Sample_52	MC2_155	836466	C	+1g	5g
Sample_52	MC2_155	2224102	G	+1c	-
Sample_52	MC2_155	5579060	A	-3cgg	4cgg
Sample_57	MC2_155	973497	C	+1g	5g
Sample_57	MC2_155	1826067	A	-1c	-
Sample_57	MC2_155	2491116	T	-1a	-
Sample_57	MC2_155	5470664	G	+1c	4c
Sample_57	MC2_155	6376534	G	+6ccgaga	-
Sample_59	MC2_155	233552	A	+1g	6g
Sample_59	MC2_155	1745431	T	-1c	4c
Sample_59	MC2_155	3729866	A	+1c	6c
Sample_59	MC2_155	4417248	T	+9cggtcggcg	-
Sample_59	MC2_155	5440311	A	+1c	6c
Sample_59	MC2_155	5585382	G	-15gaagtcgagggcgaa	-
Sample_61	MC2_155	730446	G	-1c	-
Sample_61	MC2_155	973556	C	-1g	4g
Sample_61	MC2_155	2802411	C	+1g	6g
Sample_61	MC2_155	4840396	C	+1g	3g
Sample_61	MC2_155	4950554	G	-1c	5c
Sample_61	MC2_155	5971687	T	+1c	5c
Sample_61	MC2_155	6042602	G	+1c	6c
Sample_61	MC2_155	6645711	A	-27ccgaattgccgcctccggcggcggaag	-
Sample_64	MC2_155	269838	A	-16gctggcggtgtgtcgt	-
Sample_64	MC2_155	5340355	A	+1c	5c
Sample_64	MC2_155	5547039	C	-2cg	5cg
Sample_65	MC2_155	531615	C	+1g	5g
Sample_65	MC2_155	643290	C	-2cg	5cg
Sample_65	MC2_155	1826067	A	-1c	-
Sample_65	MC2_155	4117970	T	+1c	6c
Sample_65	MC2_155	4466402	G	-1t	7t
Sample_65	MC2_155	4751583	A	+1c	5c
Sample_65	MC2_155	5236396	A	+1g	6g
Sample_65	MC2_155	5593871	G	+1c	5c
Sample_65	MC2_155	5696799	A	+1c	5c
Sample_65	MC2_155	6605517	G	+2ac	-
Sample_66	MC2_155	1602535	C	+1g	5g
Sample_68	MC2_155	2068692	C	-1g	5g
Sample_68	MC2_155	3303275	T	-9gccccggaa	-
Sample_70	MC2_155	2171738	C	+1g	5g
Sample_70	MC2_155	2176453	G	+1c	5c
Sample_70	MC2_155	3437987	T	+1c	5c
Sample_70	MC2_155	4721009	T	+1g	3g
Sample_70	MC2_155	6038898	C	+1g	6g
Sample_73	MC2_155	354179	C	-3ctg	4ctg
Sample_73	MC2_155	4084998	A	+1c	5c
Sample_73	MC2_155	4665459	G	+3gcc	-
Sample_74	MC2_155	4809494	C	-1t	3t
Sample_74	MC2_155	5230302	C	+6acggca	-
Sample_74	MC2_155	5641461	C	+1g	5g
Sample_74	MC2_155	5676116	T	+1c	5c
Sample_75	MC2_155	4369049	T	-9cggcgaggc	-
Sample_77	MC2_155	1677268	C	+1g	5g
Sample_77	MC2_155	3439623	A	+1c	-
Sample_77	MC2_155	4406107	G	+1c	5c
Sample_77	MC2_155	5232013	T	+1c	5c
Sample_77	MC2_155	5453032	C	+1g	5g
Sample_77	MC2_155	6149660	G	+1c	6c
Sample_78	MC2_155	2616393	C	+1g	6g
Sample_78	MC2_155	3750119	T	+1c	3c
Sample_78	MC2_155	3841030	T	+1c	5c
Sample_78	MC2_155	6270061	A	-1c	5c
* SSR is the simple sequence repeat size and motif where the insertion/deletion is found (minimum 3 repeats).
