# Supplementary material for: The Rate and Spectrum of Spontaneous Mutations in Mycobacterium smegmatis, a Bacterium Naturally Devoid of the Postreplicative Mismatch Repair Pathway
Source: G3 (Bethesda). 2016 May 17;6(7):2157–63. doi: 10.1534/g3.116.030130 (PMC4938668; doi:10.1534/g3.116.030130)
Supplement: Supplemental Material [file supp_g3.116.030130_TableS4.xlsx]

## Sheet: S4
Suppl. Table 4. Potential Dam* methylation site mutations
Potential Dam methylation sites	Mutations on potential methylation sites	Mean A:T-->C:G transversions per motif	Poisson probability of seeing >= observed transversions (Bonferroni correction p=0.05/30=0.0017)
AAAA	2	1.73	0.516014
AACC	4	1.73	0.0977282
AAGA	2	1.73	0.516014
AAGT	2	1.73	0.516014
CAAG	2	1.73	0.516014
CACC	20	1.73	4.55191e-15
CACG	2	1.73	0.516014
CACT	2	1.73	0.516014
CAGC	5	1.73	0.0315609
CAGG	7	1.73	0.0020659
CATC	1	1.73	0.822716
CATG	1	1.73	0.822716
GAAA	1	1.73	0.822716
GAAC	1	1.73	0.822716
GAAG	1	1.73	0.822716
GACC	30	1.73	0
GACG	3	1.73	0.250716
GACT	6	1.73	0.00866697
GAGA	2	1.73	0.516014
GAGC	2	1.73	0.516014
GAGG	1	1.73	0.822716
GATC	3	1.73	0.250716
TACG	1	1.73	0.822716
TACT	2	1.73	0.516014
AACT	1	1.73	0.822716
AAGG	1	1.73	0.822716
GAGC	2	1.73	0.516014
TACC	1	1.73	0.822716
CAGA	2	1.73	0.516014
CACA	1	1.73	0.822716
*Dam is the DNA Adenine methylase.
