# Supplementary material for: The Rate and Spectrum of Spontaneous Mutations in Mycobacterium smegmatis, a Bacterium Naturally Devoid of the Postreplicative Mismatch Repair Pathway
Source: G3 (Bethesda). 2016 May 17;6(7):2157–63. doi: 10.1534/g3.116.030130 (PMC4938668; doi:10.1534/g3.116.030130)
Supplement: Supplemental Material [file supp_g3.116.030130_TableS5.xlsx]

## Sheet: S5
Suppl. Table 5. Potential Dcm* methylation site mutations
Potential Dcm methylation sites	Mutations on potential methylation sites	Mean G:C-->A:T transition per motif	Poisson probability of seeing >= observed transitions	Significance using Boferroni cutoff P =0.05/4=0.125
CA	44	75.5	0.999966	No
CC	82	75.5	0.241767	No
CG	145	75.5	8.32445e-13	Yes
CT	31	75.5	1	No
Potential Dcm methylation sites	Mutations on potential methylation sites	Mean G:C-->A:T transition per motif	Poisson probability of seeing >= observed transitions	Boferroni cutoff P = 0.05/57 = 8.77E-04
CAAA	1	4.7	0.990905	No
CAAC	1	4.7	0.990905	No
CAAG	1	4.7	0.990905	No
CAAT	2	4.7	0.948157	No
CACA	2	4.7	0.948157	No
CACC	7	4.7	0.195395	No
CACG	4	4.7	0.690316	No
CACT	5	4.7	0.505391	No
CAGA	4	4.7	0.690316	No
CAGC	3	4.7	0.8477	No
CAGG	2	4.7	0.948157	No
CAGT	1	4.7	0.990905	No
CATC	8	4.7	0.103969	No
CATG	3	4.7	0.8477	No
CCAA	5	4.7	0.505391	No
CCAC	9	4.7	0.0502559	No
CCAG	5	4.7	0.505391	No
CCAT	1	4.7	0.990905	No
CCCA	3	4.7	0.8477	No
CCCC	5	4.7	0.505391	No
CCCG	4	4.7	0.690316	No
CCCT	2	4.7	0.948157	No
CCGA	9	4.7	0.0502559	No
CCGC	14	4.7	0.000385497	Yes
CCGG	7	4.7	0.195395	No
CCGT	5	4.7	0.505391	No
CCTA	4	4.7	0.690316	No
CCTC	3	4.7	0.8477	No
CCTG	3	4.7	0.8477	No
CCTT	3	4.7	0.8477	No
CGAA	1	4.7	0.990905	No
CGAC	10	4.7	0.0222059	No
CGAG	5	4.7	0.505391	No
CGAT	9	4.7	0.0502559	No
CGCA	9	4.7	0.0502559	No
CGCC	15	4.7	0.000117717	Yes
CGCG	20	4.7	1.32778e-07	Yes
CGCT	11	4.7	0.00902234	No
CGGA	6	4.7	0.331562	No
CGGC	16	4.7	3.38132e-05	Yes
CGGG	11	4.7	0.00902234	No
CGGT	8	4.7	0.103969	No
CGTA	3	4.7	0.8477	No
CGTC	10	4.7	0.0222059	No
CGTG	10	4.7	0.0222059	No
CGTT	1	4.7	0.990905	No
CTCA	1	4.7	0.990905	No
CTCC	3	4.7	0.8477	No
CTCG	6	4.7	0.331562	No
CTCT	1	4.7	0.990905	No
CTGA	1	4.7	0.990905	No
CTGC	2	4.7	0.948157	No
CTGG	5	4.7	0.505391	No
CTTC	4	4.7	0.690316	No
CTTG	2	4.7	0.948157	No
CTTT	3	4.7	0.8477	No
CTGT	3	4.7	0.8477	No
* Dcm is the DNA cytosine methylase.
